# Supplementary material
Source: HighWire-hosted journal article supplement (https://sti.bmj.com/content/94/1/40)

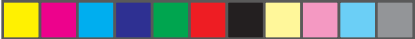

**think**  
**TWICE**

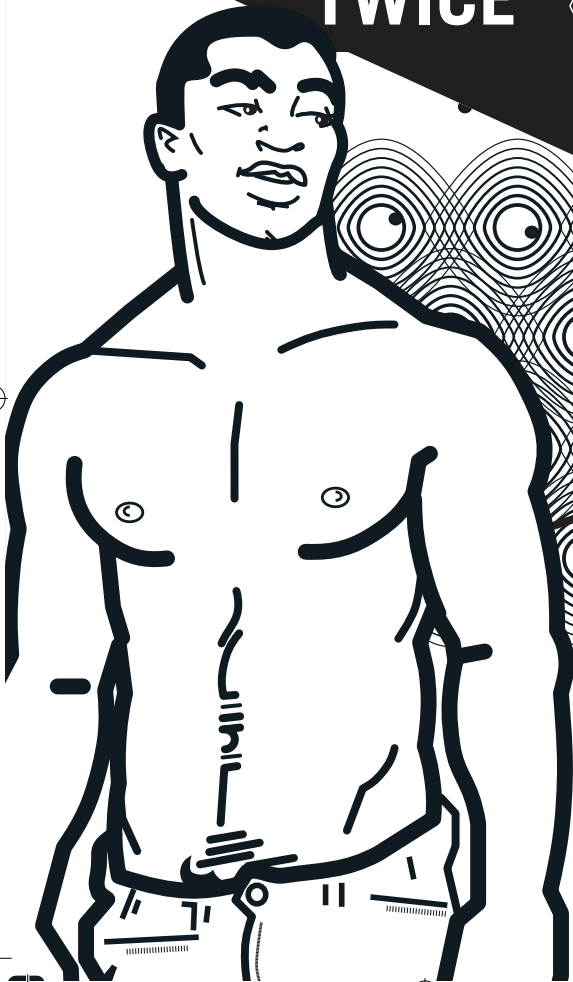

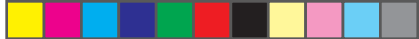

**good  
morning  
Mike**

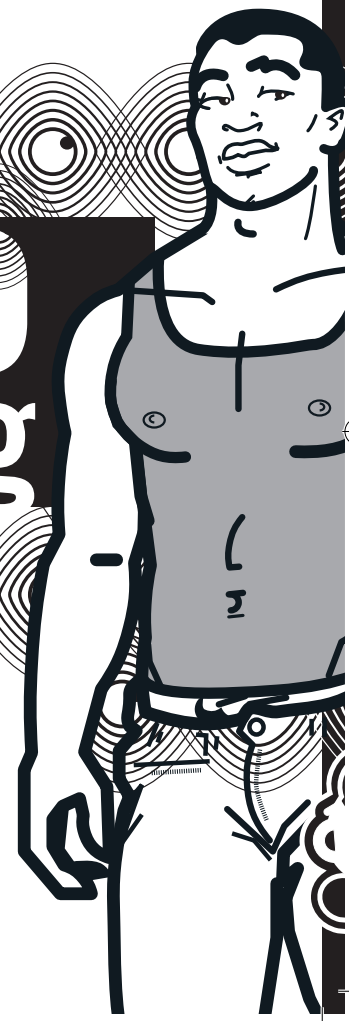

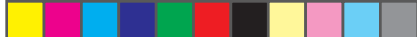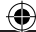

June 21  
 \* 11:30 - See  
 Dr. Robert ♥  
**HIV Test Results**

*Catch up  
 with Deion!*

*Get laundry detergent  
 call Mom*

**BOY I'M GOOD,**

**NO NEED TO SWEAT MY  
 HIV TEST RESULTS. I HAVE ONLY  
 HOOKED UP WITH  
 NEGATIVE PARTNERS....PHEW!**

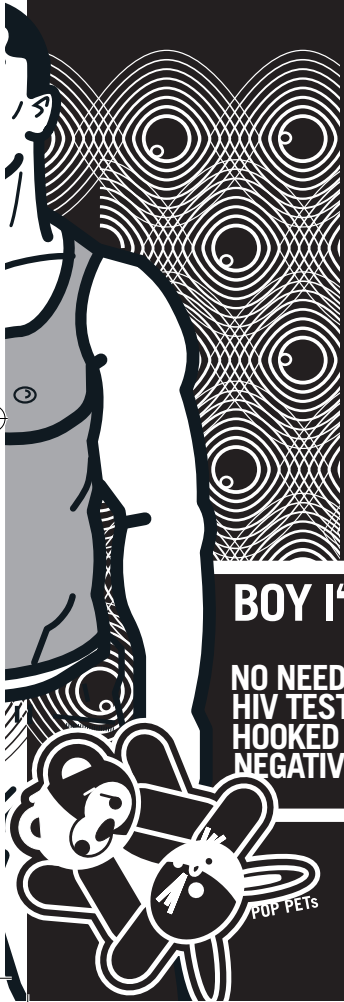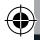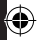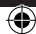



TESTING  
HIV  
CENTER

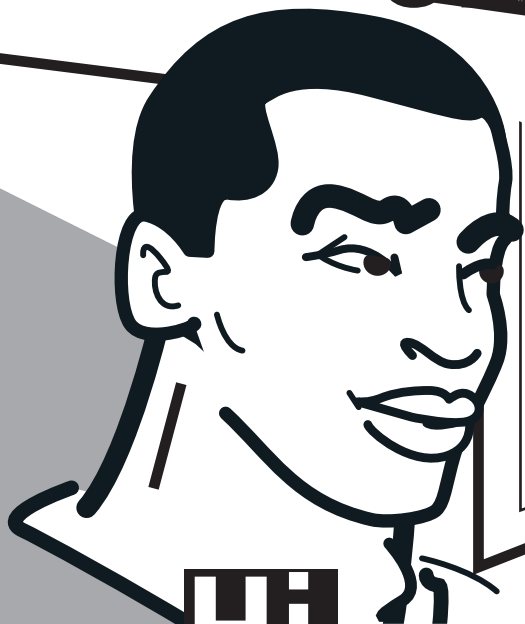

Hi  
DOC

WHAT A FINE  
ASS! TELL ME I'M  
NEGATIVE AND WE'RE  
OFF FOR A RIDE!

SO, TELL ME DOC,  
AM I COOL?

**Mike!**

**YES, MIKE, I GOT YOUR  
HIV TEST RESULT, YOU  
ARE HIV NEGATIVE.**

**THOUGHT SO. I KNEW I  
HAD NOTHING TO WORRY  
ABOUT!**

**Nice  
to see  
you**

**BUT I'LL SEE YOU IN A COUPLE  
MONTHS OR SO, RIGHT?**

**OF COURSE DOC, I'D  
SEE YOU ANYTIME.**

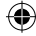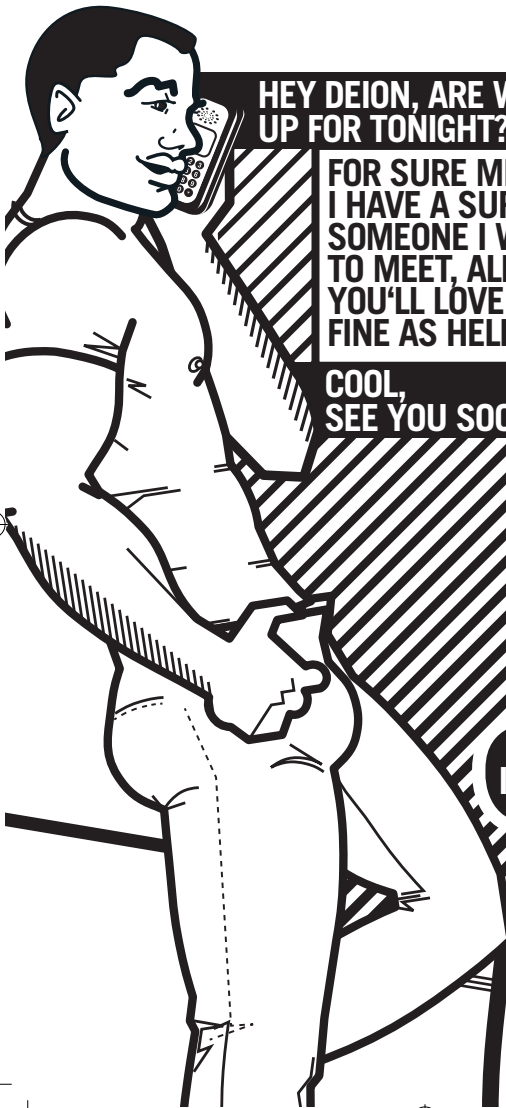

**HEY DEION, ARE WE STILL UP FOR TONIGHT?**

**FOR SURE MIKE, AND I HAVE A SURPRISE... SOMEONE I WANT YOU TO MEET, ALEX, I THINK YOU'LL LOVE HIM! HE'S FINE AS HELL!**

**COOL, SEE YOU SOON!**

**WOW – THIS GUY IS AMAZING.**

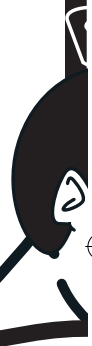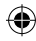

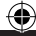

**MIKE**

HEY MAN,  
WHAT'S UP?

HEY MIKE,  
YOU'RE EARLY.  
THIS IS MY  
FRIEND, ALEX.

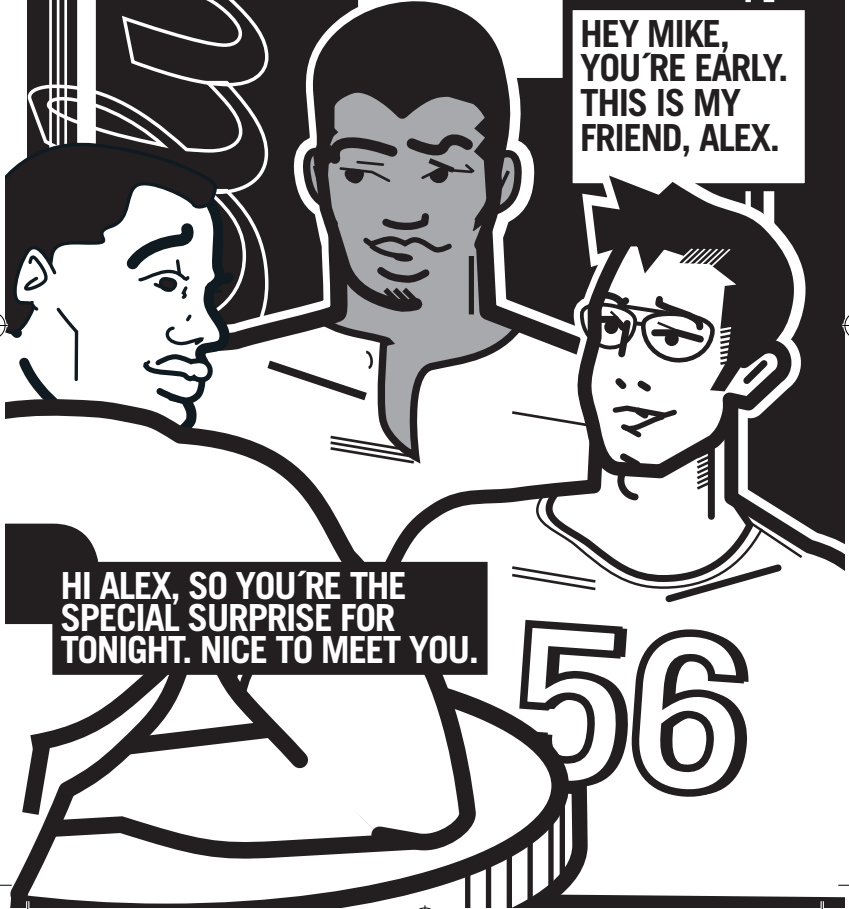

HI ALEX, SO YOU'RE THE  
SPECIAL SURPRISE FOR  
TONIGHT. NICE TO MEET YOU.

56



**this is  
off da chain!**

**I THOUGHT  
YOU WERE  
DEION'S BOY?**

**OH, WELL, UMM, I AM, BUT WE  
LIKE TO MESS AROUND ON THE SIDE  
AS WELL. WE'RE BOTH NEG AND  
ONLY FUCK NEG MEN, SO IT'S  
ALL GOOD.**

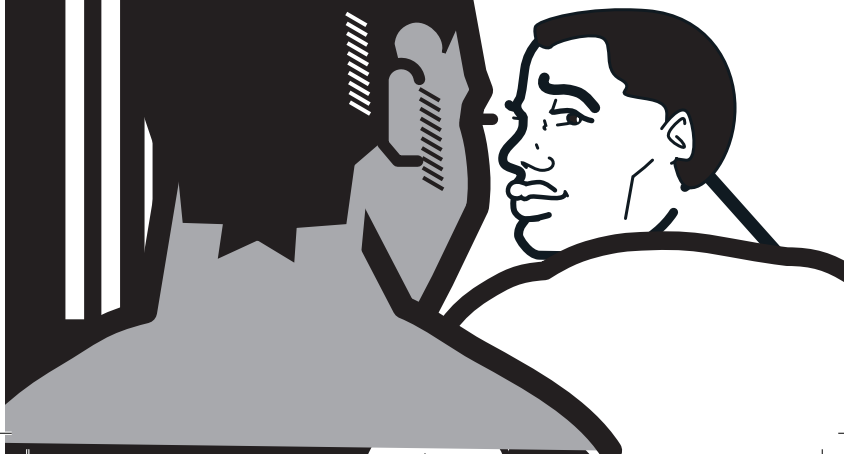



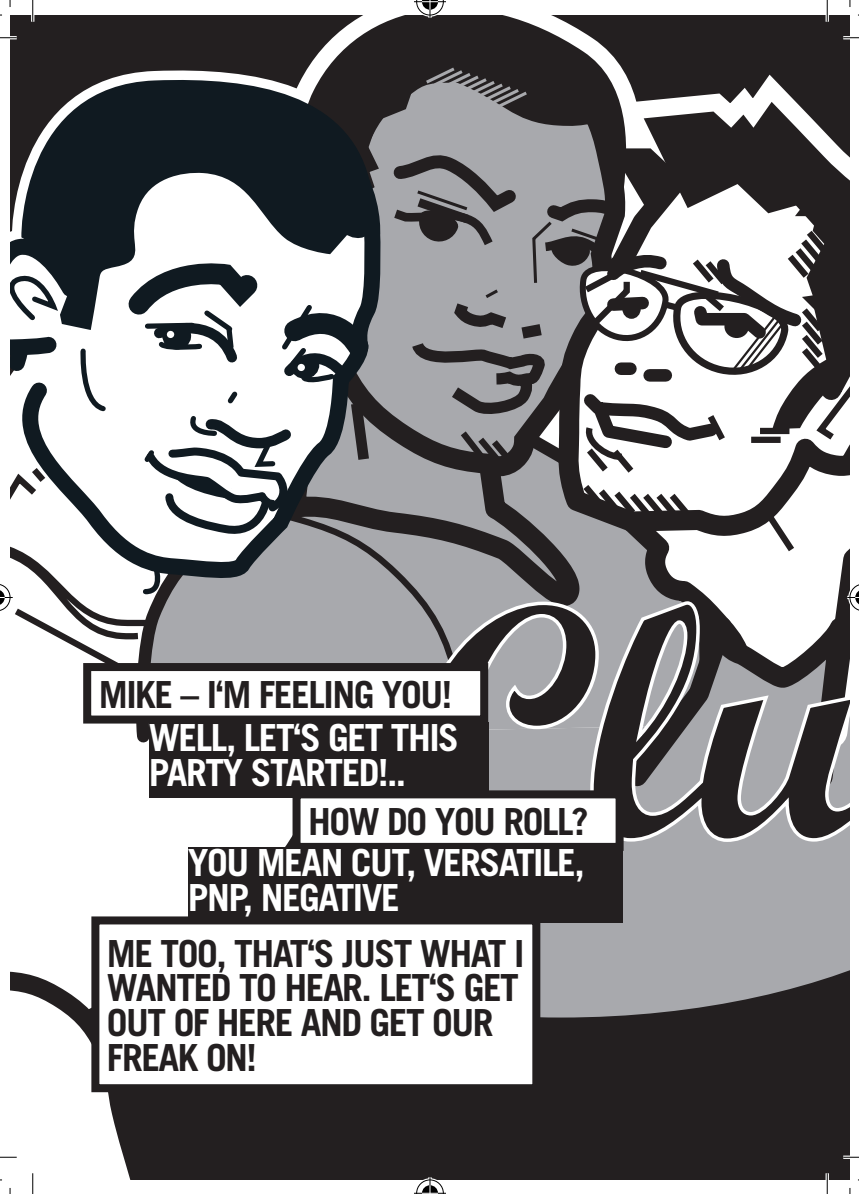

**MIKE – I'M FEELING YOU!**

**WELL, LET'S GET THIS PARTY STARTED!..**

**HOW DO YOU ROLL?**

**YOU MEAN CUT, VERSATILE, PNP, NEGATIVE**

**ME TOO, THAT'S JUST WHAT I WANTED TO HEAR. LET'S GET OUT OF HERE AND GET OUR FREAK ON!**

*lu*



# ALEX

SINCE WE'RE  
BOTH NEGATIVE,  
FUCK ME RAW!

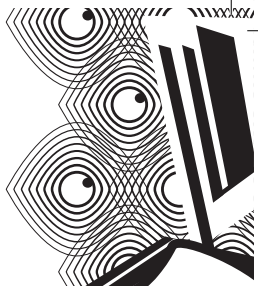

**CENSORED!**

HELL YEAH,  
GO FOR IT!!!



**IT'S SO MUCH BETTER  
RAW, I CAN FEEL ALL  
OF YOU.**

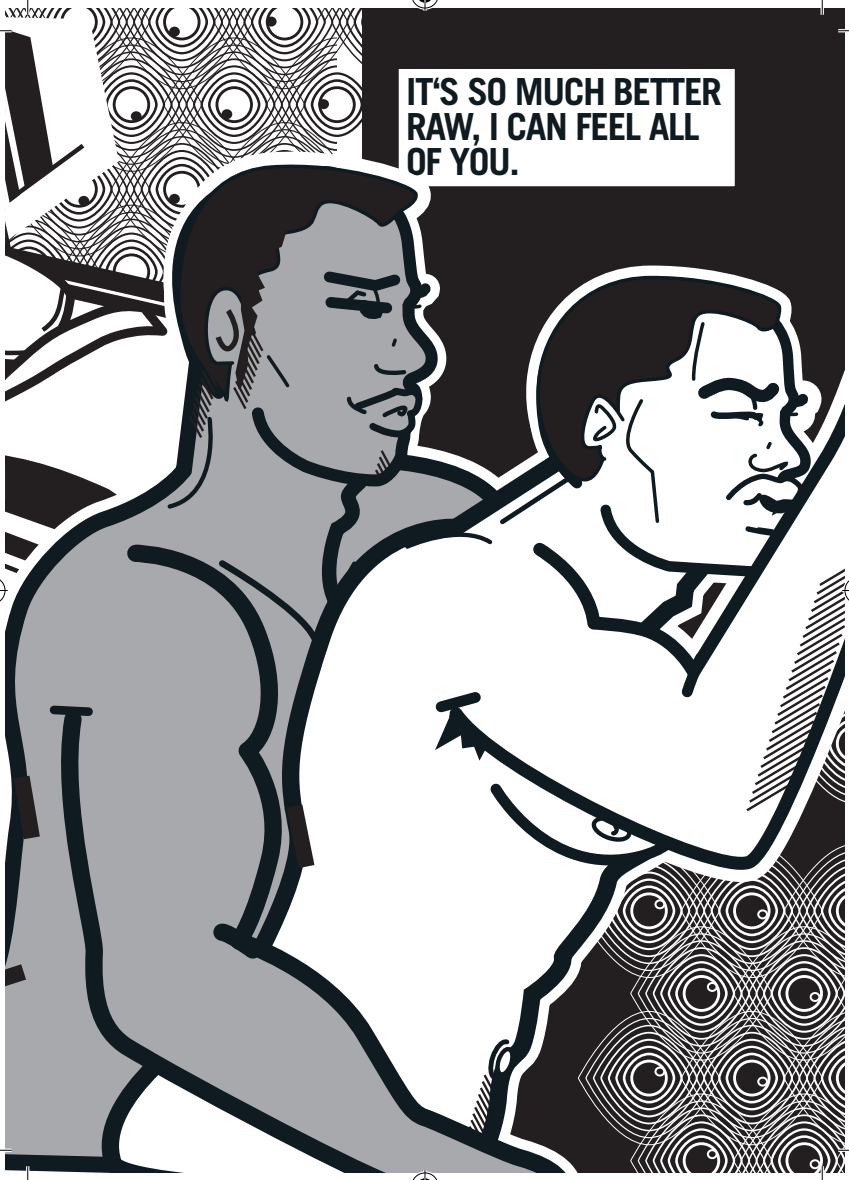



MAN, HE'S  
FINE AS HELL!

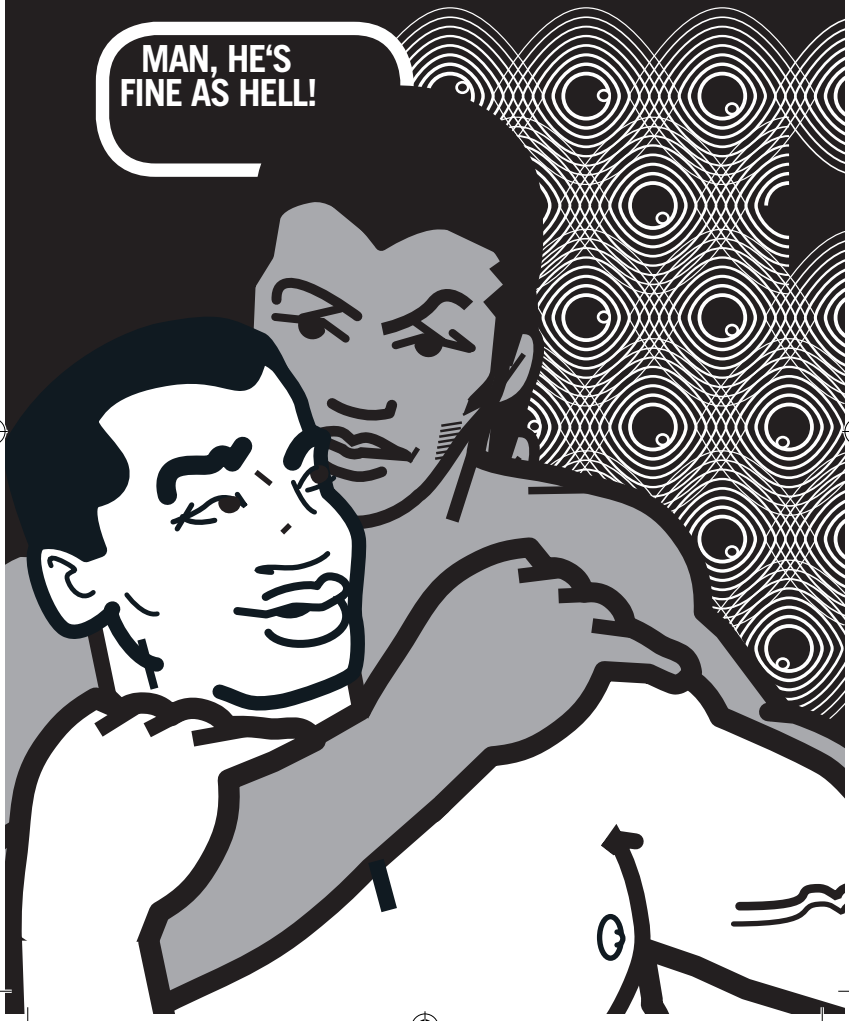

THREE MONTHS LATER...

DAMN I'M LUCKY. I HAVE  
HAD SOME HOT SEX THESE PAST  
FEW MONTHS. IT FEELS GOOD  
TO FUCK THESE GUYS AND NOT  
WORRY ABOUT HIV.

HEY...MY NEXT TEST  
WITH THAT FINE DOC  
IS THIS WEEK.

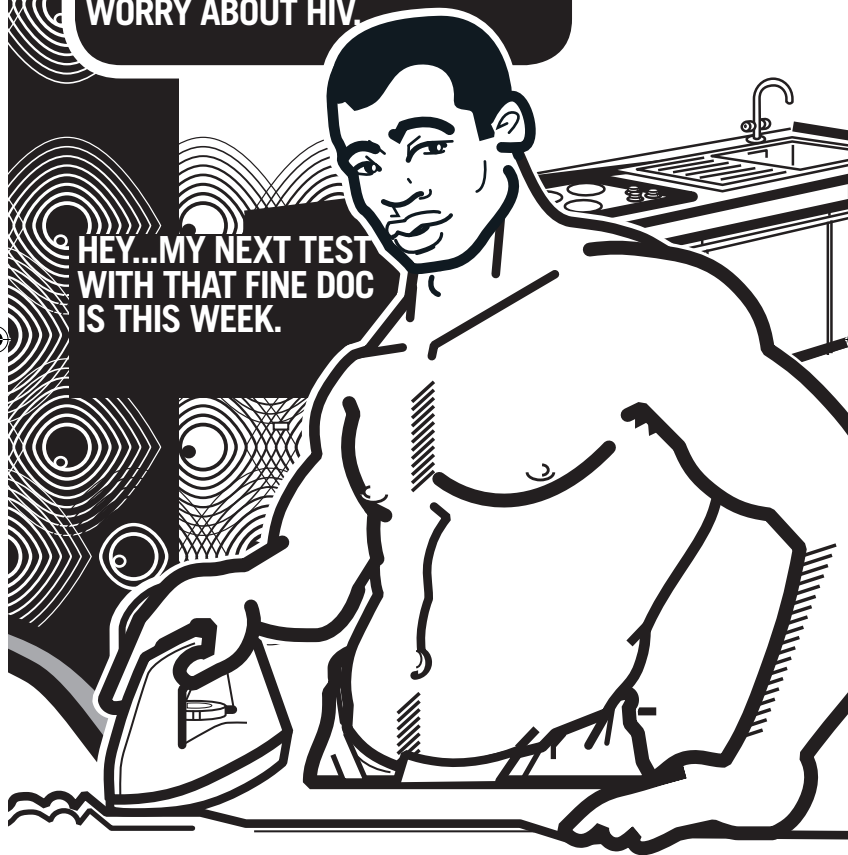

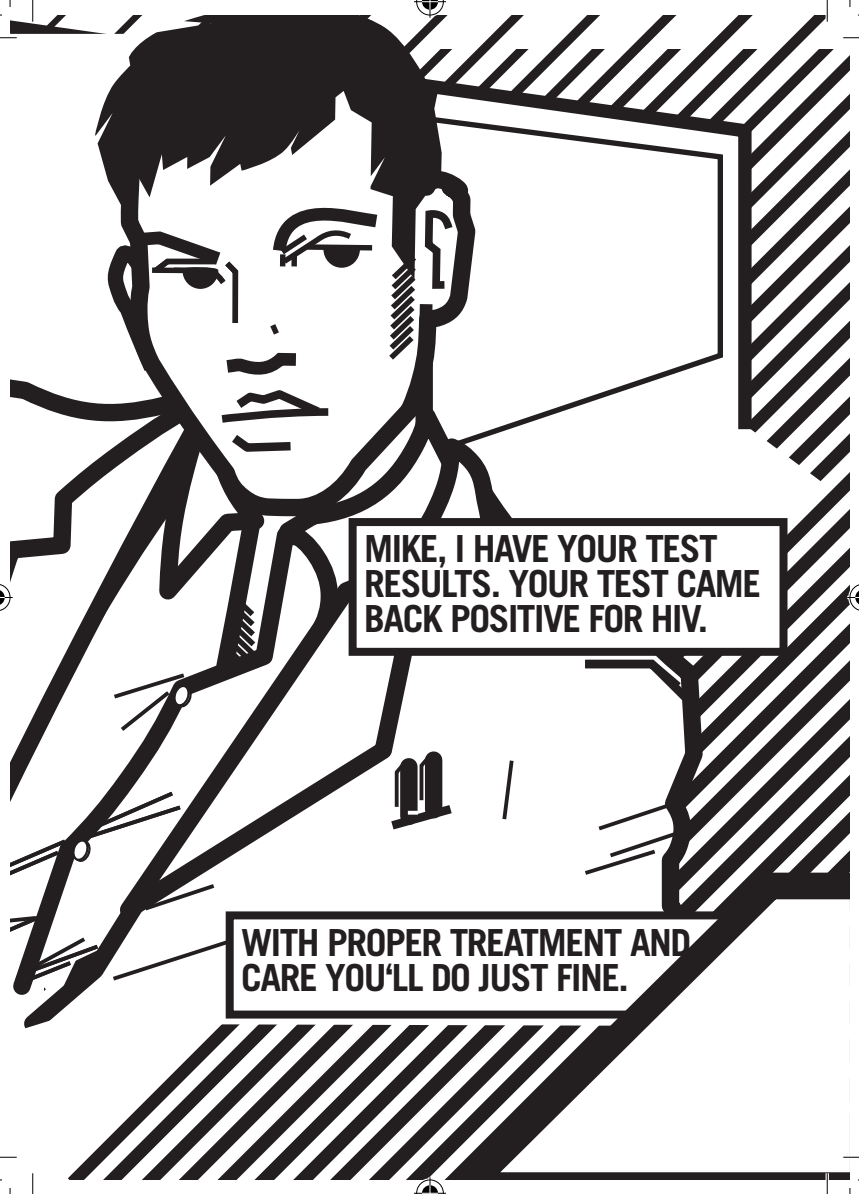

**MIKE, I HAVE YOUR TEST RESULTS. YOUR TEST CAME BACK POSITIVE FOR HIV.**

**WITH PROPER TREATMENT AND CARE YOU'LL DO JUST FINE.**



**POSITIVE ?**

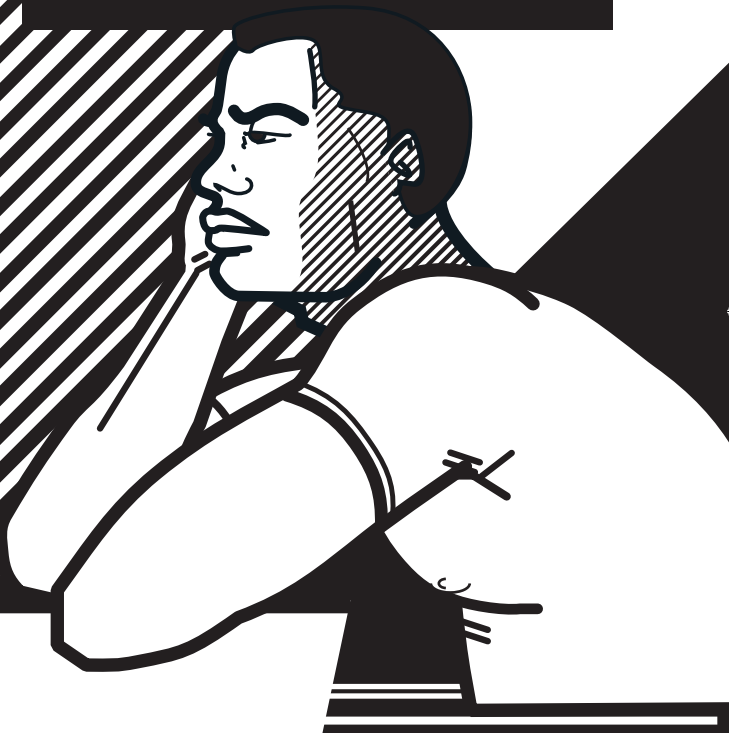

**DAMN, HOW COULD THIS  
HAVE HAPPENED?  
I ONLY FUCKED NEGATIVE MEN!**

*Design & Illustration: p239*  
*www.p239.com*

- **EVEN IF YOU TEST FOR HIV REGULARLY YOU CAN'T BE CERTAIN YOU ARE HIV NEGATIVE IF YOU HAVE RISKY SEX BETWEEN TESTS.**
- **DURING THE INITIAL STAGE OF HIV INFECTION IT IS POSSIBLE TO TEST HIV NEGATIVE BUT REALLY BE HIV POSITIVE DUE TO THE "WINDOW PERIOD".**
- **ALWAYS USE A CONDOM DURING ANAL SEX WITH CASUAL PARTNERS.**

**FOR MORE INFORMATION CONTACT:**



WELCOME TO:

# think TWICE

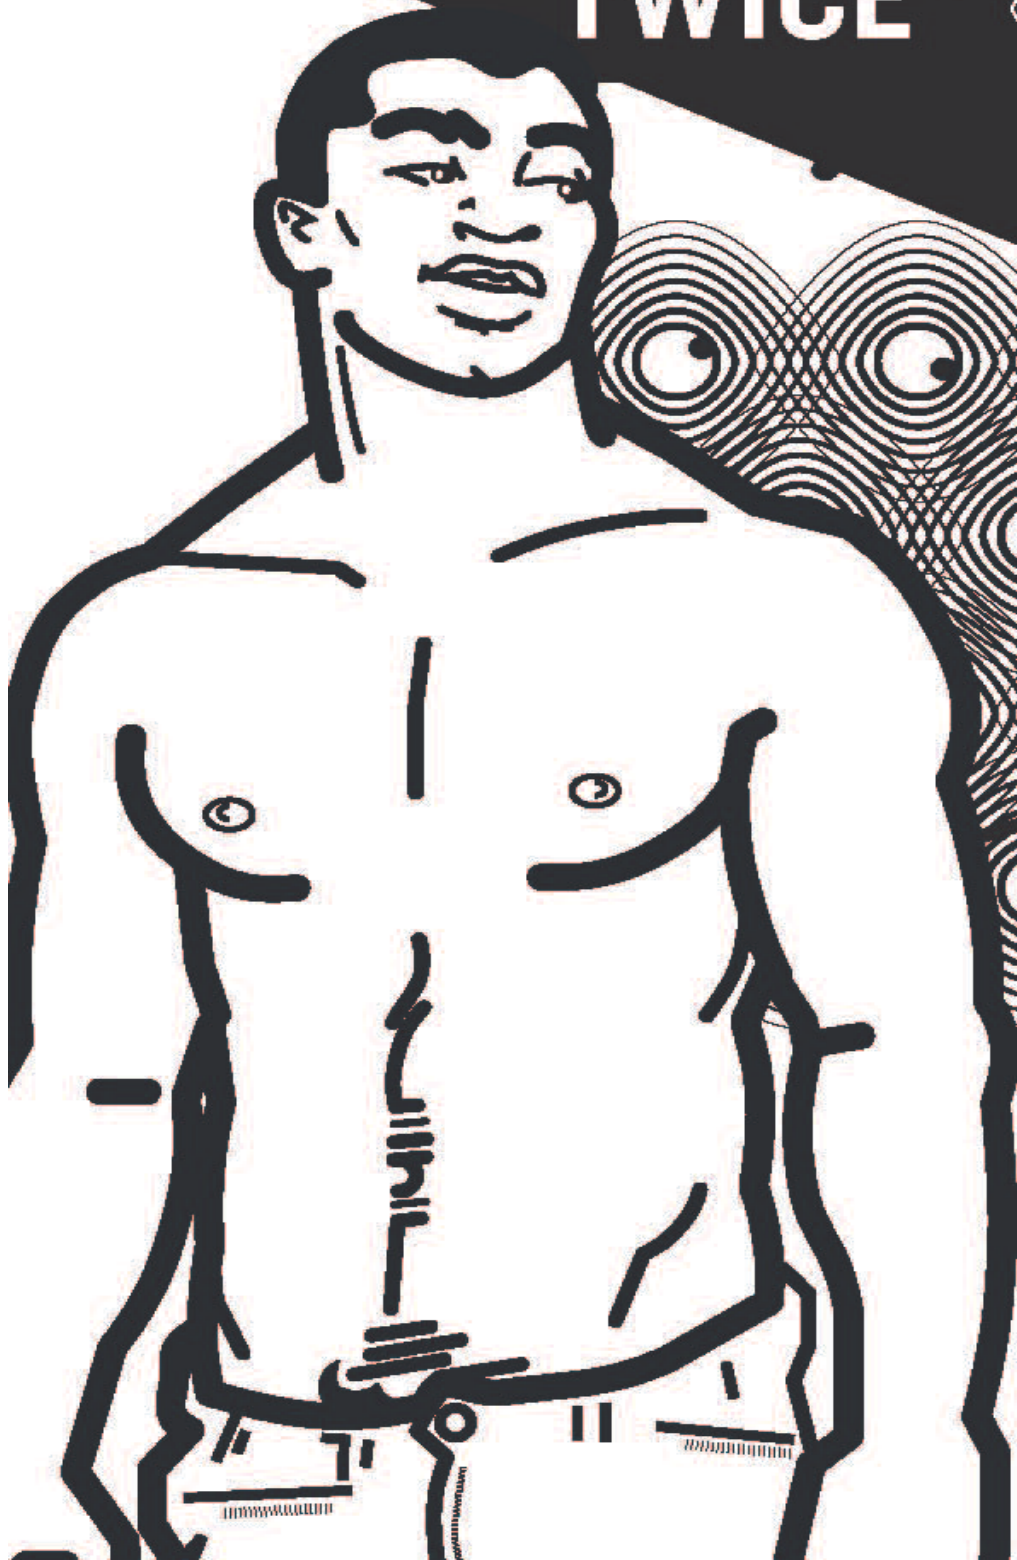

# What's going on...

With You,  
Your Friends,  
and Your  
Community?

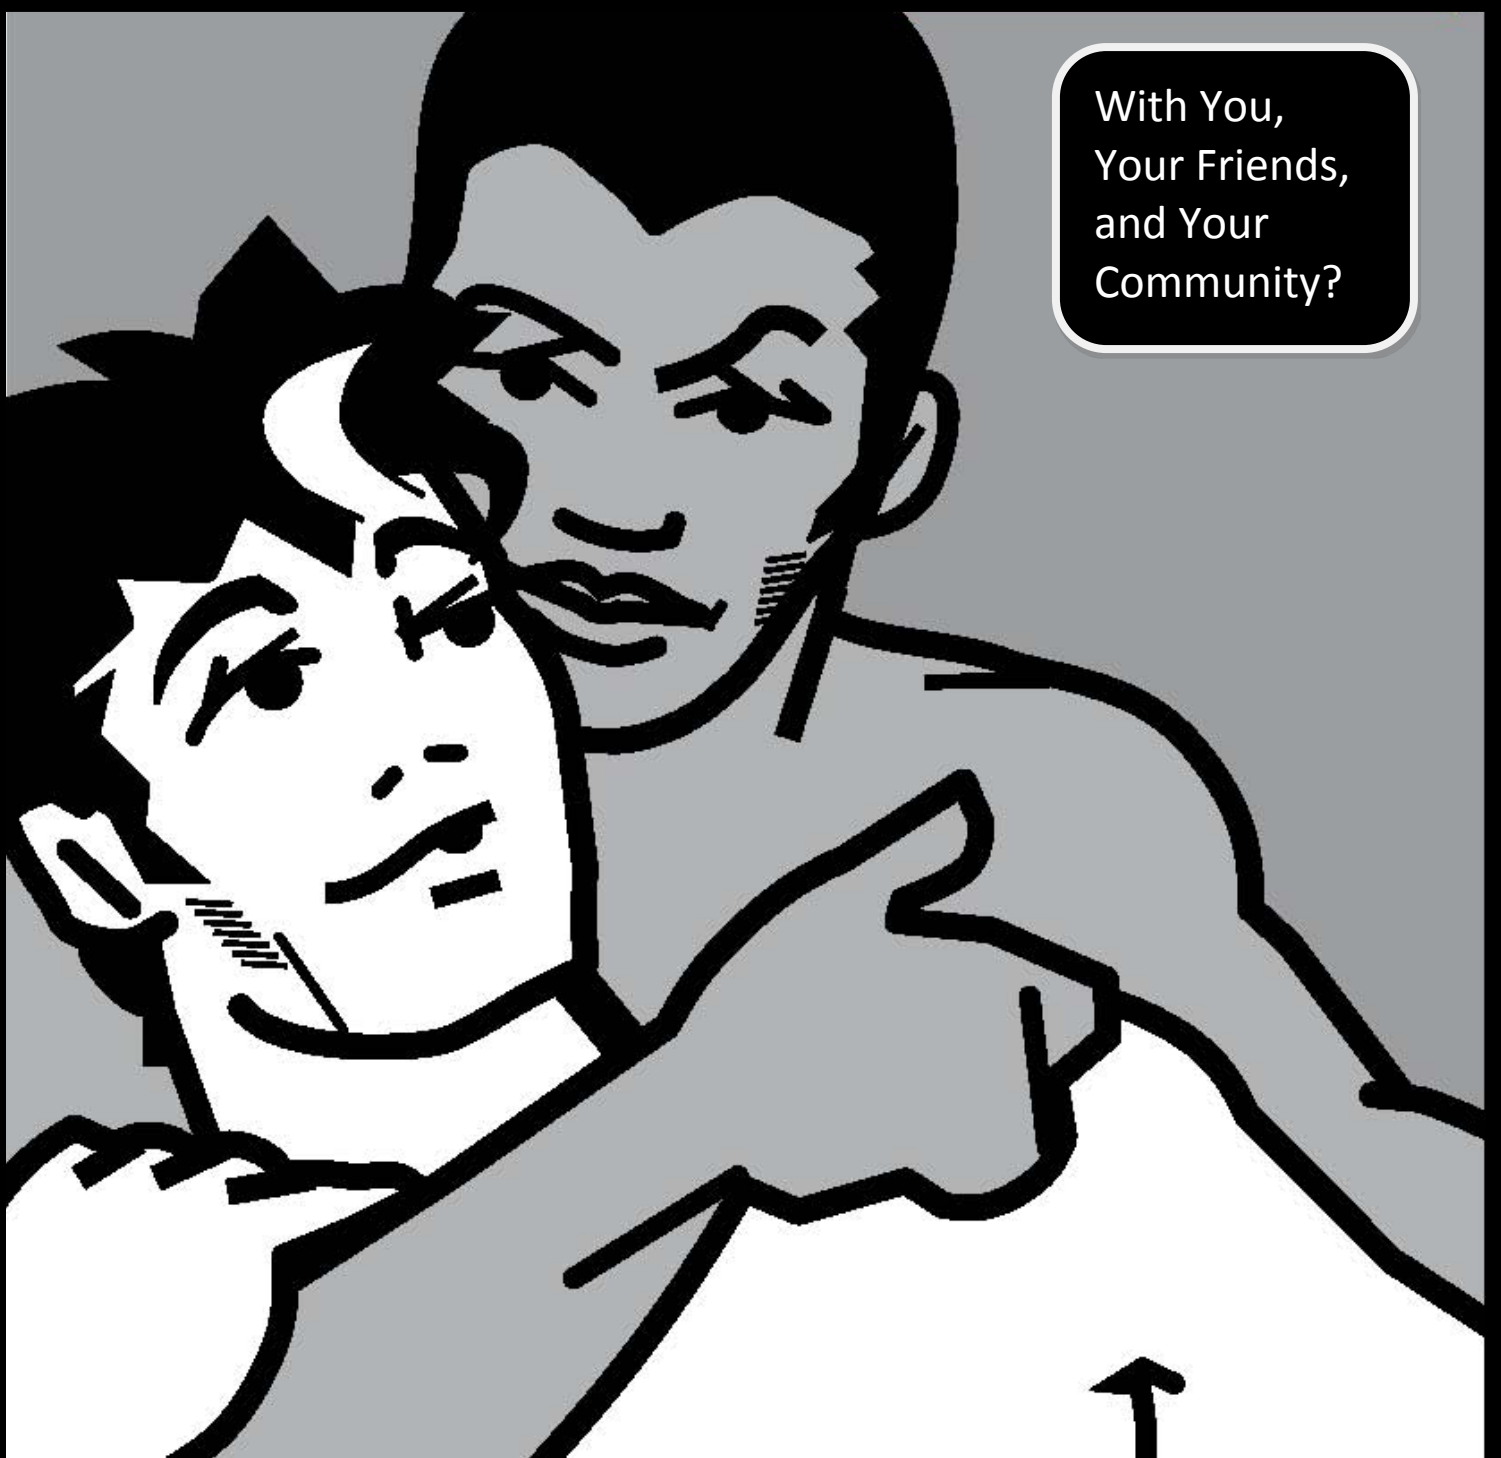

# How much risk for HIV do you think you are currently taking?

| No Risk | Moderate Risk | High Risk |
|---------|---------------|-----------|
|         |               |           |

How much risk do you take compared to your friends?

How often do you test for HIV?

Do you know when your partners tested for HIV?

How do you see HIV affecting your community?

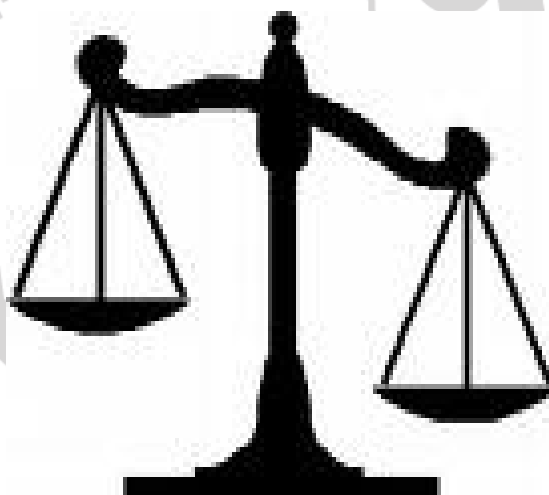

# Mike's Story

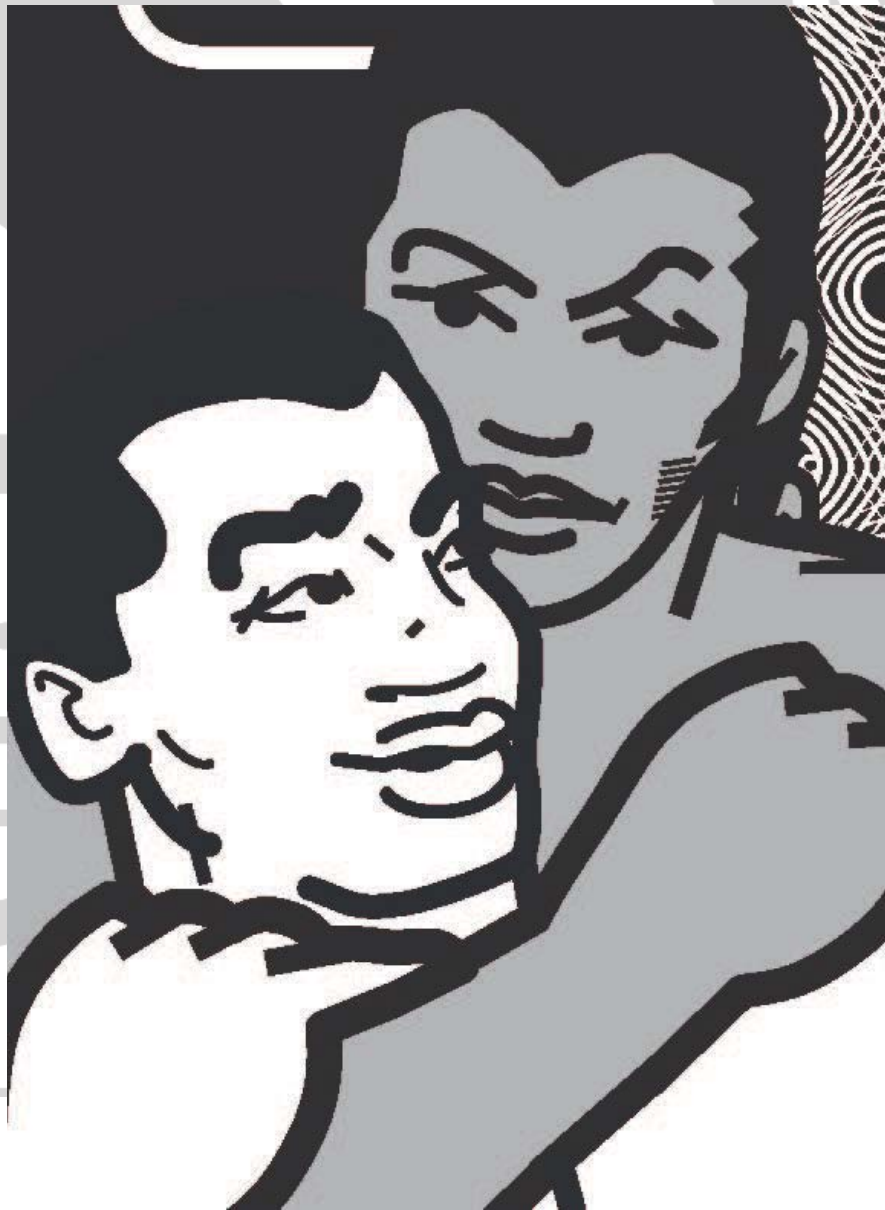



# How'd Mike become HIV+?

Could Alex  
have been HIV  
positive?

Could Mike  
have already  
been infected?

What about  
Mike's other  
partners?

Could Deion  
have been HIV  
positive?

What does Mike  
know about when  
his partners  
tested?

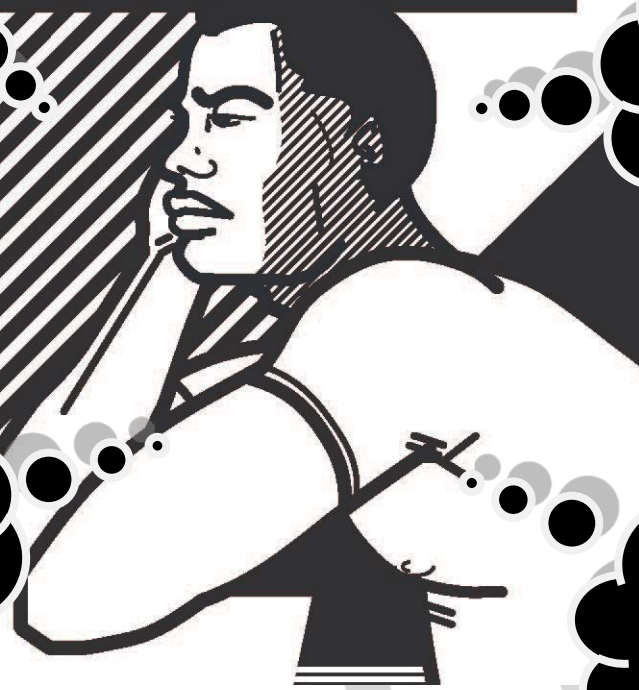

# How about Deion and Alex, and their risks?

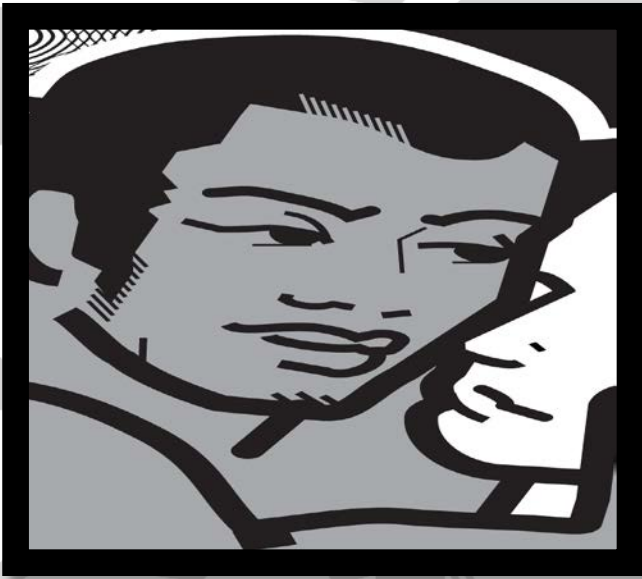

Was Mike HIV positive when he said he was HIV negative?

Could Mike engage in risk for HIV and still be certain he's HIV negative?

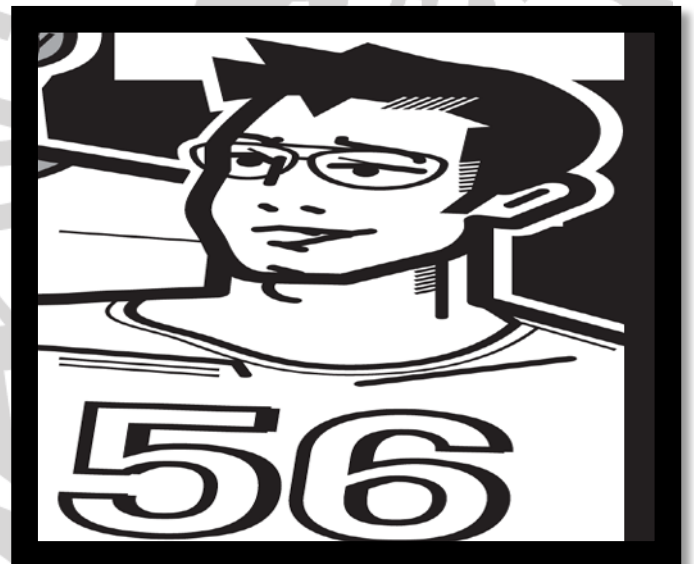

# A closer look at Mike's partners

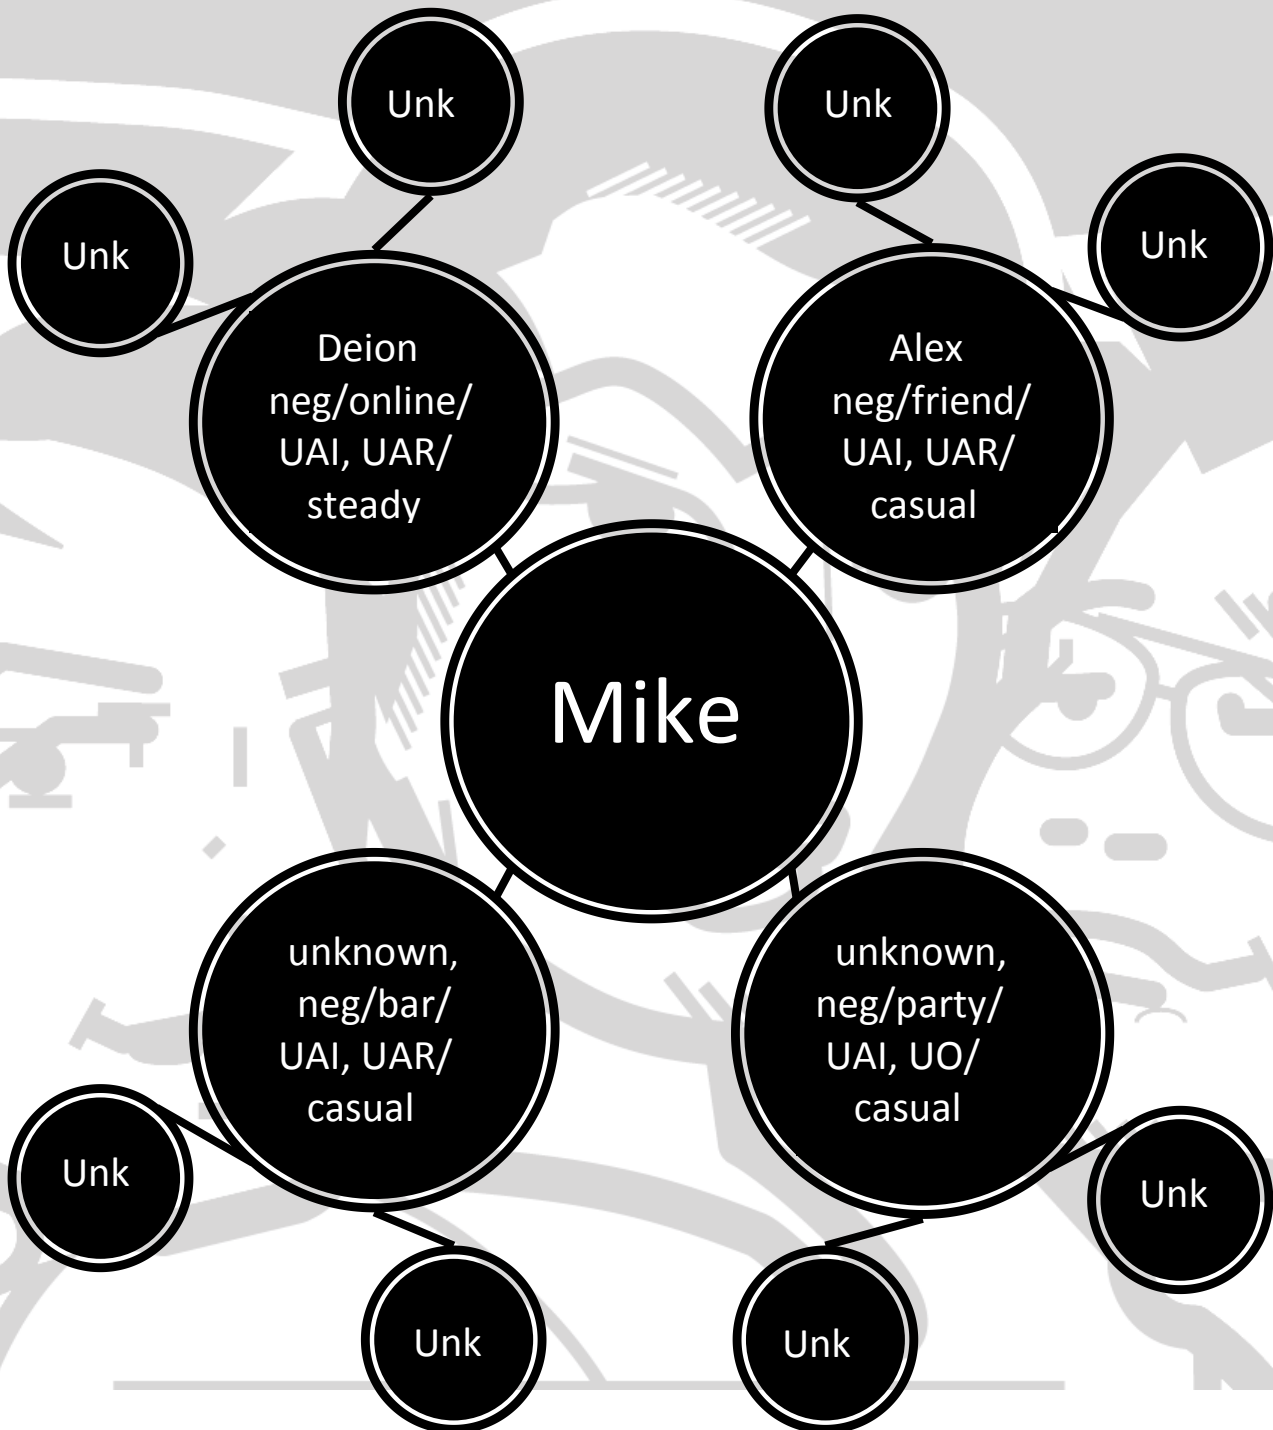

# A closer look at the window period

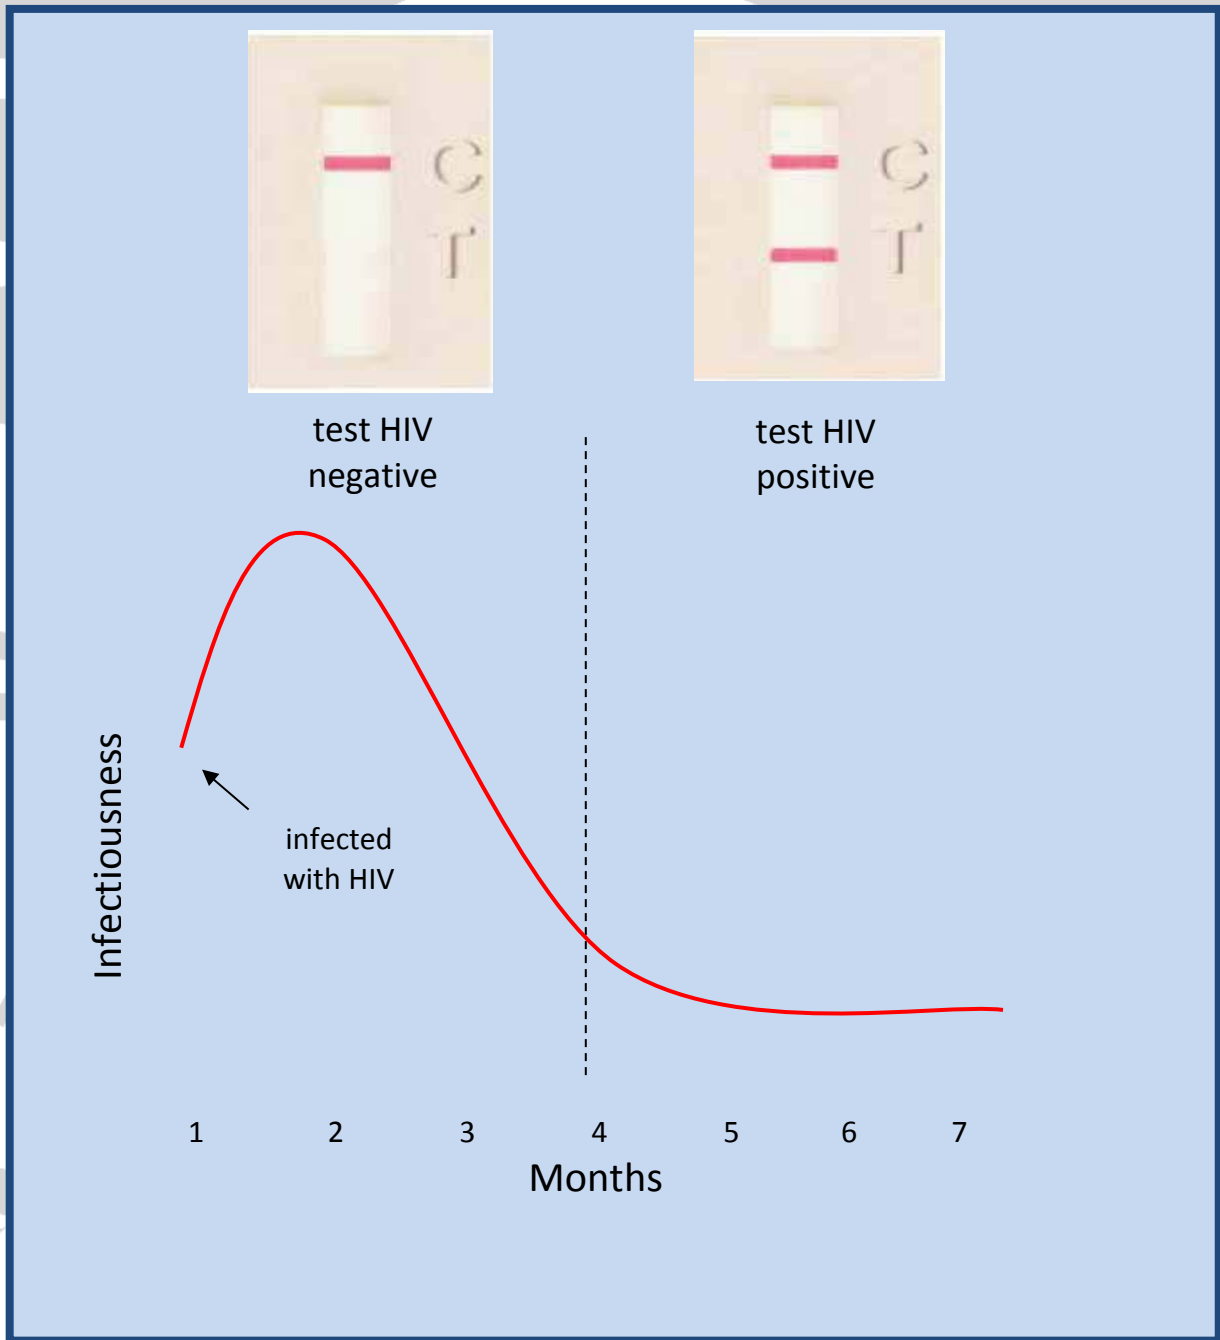



# What about other STDs?

No condoms

Potential  
STD infection

Increased  
risk for HIV

# Tell me about you

Think about your sexual partners

Have you engaged in risk?

How much risk have you taken?

What did you do with these partners?

Did you use a condom?

Did you know each other's HIV status?

***Let's look at your partners***

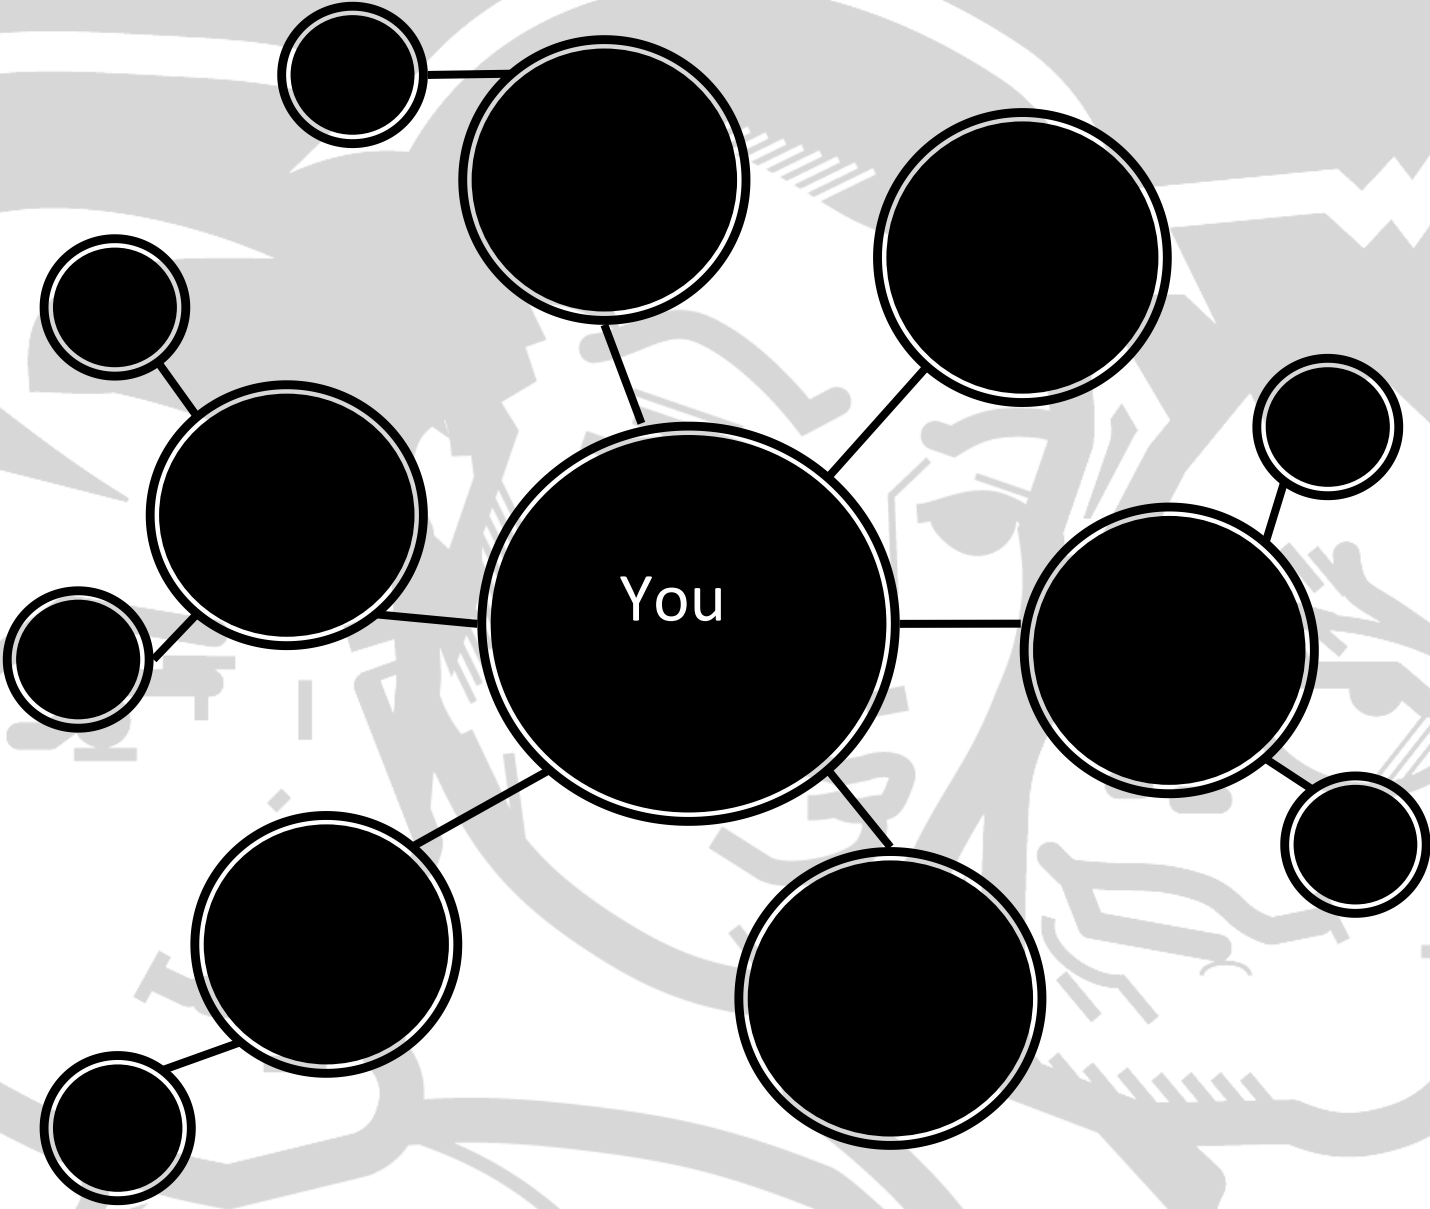



# ***A reasonable plan***

Think of a goal



Identify the obstacles



Action Steps

---



**ADDY**

**?**

**Or comments**

---

## INTERVENTION CONDITION

### INTRODUCTION AND ORIENTATION TO THE SESSION

#### Introduce yourself to client

- Hello, my name is \_\_\_\_\_. I'll be your counselor for THINK TWICE.

#### Outline of session content

- Let me tell you what we will be talking about.
  - We'll look at and discuss a graphic novel.
  - We'll talk about your sexual partners.
  - We'll look at ways in which you could reduce any risks for HIV/STI you are taking and develop a simple plan to reduce those risks.

#### Explain the role of the counselor

- I'll be using a graphic novel as a guide to help us stay focused.
- I'll work with you as we go through the session activities.
- Everything we talk about is confidential. I hope that helps you feel comfortable talking about personal issues.

#### Referrals

- If we identify any issues we cannot address here, I can make referrals to other services for help - if you are interested.

#### Address immediate questions and concerns

- Before we go any further, do you have any concerns or questions you need to talk about right now?

### ASSESSING CLIENT'S PERCEIVED RISK

#### Gather information on client's perspective of how much risk they have been taking for HIV.

- *Transition Statements*
  - Part of this session will be examining times when you might have put yourself at risk for HIV. I would like to get a sense of your perspective on this.
  - To begin, please think about the past six months. During this time period, think about the people you had sex with and what you did with them.
  - Please tell me, on a scale of 0-10 with 0 meaning no/low risk and 10 meaning very high risk, how much risk you have taken for HIV in the past six months. **[Must ask this question]**
  - Please tell me, on a scale of 0-10 with 0 meaning no/low risk and 10 meaning very high risk, how risky for HIV do you think it is to have unprotected anal sex with a man you just met who tells you he is HIV negative? **[Must ask this question]**

## REVIEW THE GRAPHIC NOVEL AND MIKE'S RISK HISTORY

### Have the client read and discuss the novel

- *Transition Statements*
  - Now I am going to give you a short story to read.
  - The story is about a man, Mike, who is HIV negative and uses a certain strategy to stay HIV negative.
  - Please read over the story. As you read through it, think about ways in which Mike might be protecting or exposing himself from HIV.
  - I'm going to give you time to read the story, I'll be back in five minutes, or longer if needed.

**Leave the room to let client read the story on their own. Check back with the client in about five minutes.**

### Assess client's understanding of the material

- Let's start by having you tell me if you think Mike's behaviors were safe or risky for HIV infection.
- Tell me how you think Mike became HIV infected.

**Address all ways in which Mike could have become HIV infected. While engaging in this discussion use Mike's sociogram to talk through the partners he has had and the behaviors he engaged in with those partners.**

- *[Walk through the story, and highlight how serosorting could have led to Mike becoming HIV infected]*
  - If Deion is having unprotected sex can he be certain that he is HIV negative?
  - Alex says that he is HIV negative, can he be certain of this?
  - Mike serosorts not only with Deion and Alex but also refers to having "some hot sessions these past few months", can Mike be certain all his partners were HIV negative?
- *[Discuss why it is difficult to engage in sexual risk behavior and be certain that you're HIV negative.]*
  - How is it possible for Mike, Deion, and Alex to engage in unprotected sex with multiple partners and be certain they are HIV negative?
  - How often do you think most gay/homosexual men get tested for HIV? Is it enough, or could it ever be enough to be certain of HIV status?
  - Are there any questions that Mike could have asked Deion or Alex to be certain of their HIV status? ***[If someone is engaging in risk behavior between HIV testings, it is impossible to be certain of their HIV status. This needs to be made clear]***

**Address ways in which Mike could have infected Alex, Deion, or another unknown partner with HIV. Again, use sociogram for this discussion.**



- *[Mike does test HIV negative to begin with, however, he could have been acutely HIV infected or he could have become infected shortly after testing negative and infected another partner.]*
  - At what point do you think Mike became HIV infected in the story?
  - Could he have infected Alex, Deion, or another unknown partner?
  - Is it possible that when Mike told Alex he was HIV negative that he was really HIV positive?
  - Could Mike have been infected throughout the whole story?
- *[This is the point in which acute infection needs to be discussed, if it hasn't been already]*
  - Tell me what you know about acute HIV infection or what's referred to as the "window period".

**Talk about how Mike's strategy of using serosorting does not protect from other sexually transmitted infections.**

- Now that we have discussed how Mike put himself or others at risk for HIV, tell me what you think about the likelihood of Mike having exposed himself to other sexually transmitted diseases.

**REVIEW CLIENT'S RISK BEHAVIOR**

**Ask client to talk about their sexual partners from the past six months.**

- *Transition statements*
  - At this point, I am going to ask you to tell me about the sexual partners you have had in the past six months.
  - I am going to ask you to fill out a sociogram for yourself, similar to how Mike's was filled out.
  - Do you have any questions you need answered now?

**Steps to filling out the sociogram**

- The first thing I would like to do is have you tell me the initials of the sexual partners you have had in the past six months. I will write the initials in the bubbles. For unknown partners I will just write unknown.
- One at a time, tell me what you did with each partner. For the first partner please tell me: ***[please see code at end of manual to fill information into the bubbles; repeat questions for every partner]***
  - (1) At the time you had sex with him/her what did you think his/her HIV status was?
  - (2) How did you know his/her HIV status?
  - (3) What did you do sexually (vaginal, anal, oral) with that partner and did you use a condom?
  - (4) Was this partner steady or casual?

### **Further points of discussion for questions 1 & 2**

- How did you go about making your conclusion about his/her HIV status? Did you look for visual cues, was it where you met the person, was his/her HIV status in an online profile, did a friend tell you, did he/she verbally tell you?
- How certain are you that you made the right conclusion?
- Did you ever verbally discuss his/her HIV status? If so, did you ask when he/she was last HIV tested?

### **Wrap up discussion points for client's risk behaviors**

- *Review the difficulties in being certain of your own and your partners' status.*
- *Review the risks posed by acute HIV infection*
- *Review that serosorting does not protect against sexually transmitted infections*

## **PERSONALIZED FEEDBACK AND TAILORED RISK REDUCTION PLAN**

### **Assess client's risk perception**

- *Transition statements*
  - Now that we have talked about your sexual partners from the past six months, and the limitations of being certain of your partners HIV status, I am going to ask you some questions about your perception of risk.
  - These questions are the same as the ones I asked before.
- *Questions about risk perceptions*
  - Please tell me, on a scale of 0-10 with 0 meaning no/low risk and 10 meaning very high risk, how much risk you have taken for HIV in the past six months.
  - Please tell me, on a scale of 0-10 with 0 meaning no/low risk and 10 meaning very high risk, how risky for HIV do you think it is to have unprotected anal sex with a man you just met who tells you he is HIV negative?
- *Compare responses of these questions to the responses of when the questions were originally asked.*
  - *If either response is higher now than it was before:*
    - Let's talk about why you think your perception of risk increased.
    - What factors made you change your perception of risk?
  - *If either response lower now than it was before:*
    - Let's talk about why you think your perception of risk decreased.
    - What factors made you change your perception of risk?
- *For responses lower than 4*
  - You rated this question a '2' meaning that you see some risk, can you tell me why you rated this question a '2' and not a '1'?
- *For responses 5 or higher*
  - You rated this question a '6' which indicates that you think there is some risk. What are the reasons you feel that caused you to perceive risk?

### **Provide feedback on client's risk behavior**

- First, you have been able to protect yourself when *[list circumstances that helped client reduce risk]*.
- And from what you have told me, there have been \_\_\_\_\_ [quite a few/some/a couple of] times when you've put yourself at risk for STIs or HIV.

### **Summarize and reflect on main risk factors**

- It seems that your main risk factors are \_\_\_\_\_.
- *Risk factors are: relying on HIV negative status of partner to protect from HIV, reporting unprotected sexual partners etc.*

### **Creating a risk reduction plan**

- Given what we have talked about, what do you think are your biggest obstacles for staying HIV negative?
- What do you think are the most important issues and circumstances we need to address for you to stay HIV negative?

### **Explore behaviors that the client will be most motivated to engage in or capable of changing**

- What do you believe you could reasonably do? What are some behavioral goals you feel you could reasonably reach?
- *[If the client is unable to think of anything remind them of the list]* Remember your risk issues included [list]. You have some options for reducing your risk.

### **Identify reasonable, yet challenging steps toward reducing risk behavior**

- Based on what we have identified for your goal(s), let's come up with a plan for engaging in those behaviors.
- Tell me what steps you can take to reach your behavioral goal(s)? Tell me what you will do first, second, third etc.

### **Problem solve obstacles**

- What do you think would get in the way of engaging in these steps?
- How could you manage these obstacles?

### **Role play the plan**

- Let's practice what you might say or do to enact your plan.
- How will you handle \_\_\_\_\_ if it occurs?

### **Confirm with the client that the plan is reasonable and acceptable. [read steps of plan out loud]**

- How comfortable are you with this plan?

### **PROVIDE APPOINTMENT CARD AND REMINDER FOR FOLLOW UP**

### **Schedule participant for follow-up**

- Let's schedule a time that you would be available for your follow up appointment.
- Next time you come in it will only be a computer interview, no counseling session.

**Identify ways to help the client remember follow up events.**

- What would help you remember this appointment? *[cell phone calendar, date book, card in wallet, card on refrigerator etc.]*

**Thank the client for their participation**

- I hope that this time together has been helpful to you
- I want to thank you for your contribution to our project

Code for question 2

|          |     |
|----------|-----|
| Negative | NEG |
| Positive | POS |
| Unknown  | UNK |

Code for question 3

|                                                    |     |
|----------------------------------------------------|-----|
| Unprotected anal intercourse as insertive partner- | UAI |
| Unprotected anal intercourse as receptive partner- | UAR |
| Protected anal intercourse as insertive partner-   | PAI |
| Protected anal intercourse as receptive partner-   | PAR |
| Unprotected vaginal intercourse-                   | UVI |
| Protected vaginal intercourse-                     | PVI |
| Unprotected oral sex-                              | UO  |
| Protected oral sex-                                | PO  |

For example, information about sexual partners should be written as follows:

(1) Neg (2) online profile (3) UAI, PAR (4) steady

## CONTROL CONDITION

### INTRODUCTION AND ORIENTATION TO THE SESSION

#### Introduce yourself to client

- Hello, my name is \_\_\_\_\_. I'll be your counselor for THINK TWICE.
- How did you hear about the Think Twice project?
- Have you heard anything about what we will be doing here today?
- I'm gonna ask you some questions about drugs/substance use and risks for HIV/STDs.

#### Orientation to the session

- We'll talk about what is happening in the community and how drugs and alcohol can play a role in risk for HIV/STD. If you are ok with it, I will ask you to share times when you might have drunk or used drugs and maybe some new ideas to help make sure you stay healthy.
- Everything we talk about is confidential. I hope that helps you feel comfortable talking about personal issues.

If we identify any issues we cannot address here, I can make referrals to other services for help - if you are interested.

#### Address immediate questions and concerns

- Before we go any further, do you have any questions?

The first thing we are going to do is talk about drinking alcohol. I will ask you some questions about your alcohol use and then we'll discuss your answers. You might be wondering why we are discussing alcohol use and what it has to do with HIV/STD. We have found that drinking/drug use can be a risk factor for contracting HIV/STDs.

#### Elicit general connection between HIV/STDs and alcohol use

- Why do you suppose there is a connection between risk for HIV/STD and alcohol use?
- How does alcohol affect judgement, impulsiveness and interest in sex?
- How might these risks put a person at risk for HIV?

So you understand what we're getting at. Alcohol impairs judgement, increases impulsiveness and can increase desire for sex. These alcohol effects can lead to behaviors that could put someone at risk for contracting STDs.

- Does this ever happen to you?

#### Transition Statement

Now I am going to ask you some questions about your history of drinking alcohol.

- Administer AUDIT. (See below for the AUDIT)

- A score of 8 or more is associated with harmful or hazardous drinking, a score of 13 or more in women, and 15 or more in men, is likely to indicate alcohol dependence.

### **For scores above 8**

- What concerns you about your drinking?
- What, if anything, has drug/alcohol use cost you? (legal, health, emotional, relationships/family, employment, financial, spiritual)
- Who, if anyone, is concerned about your drug/alcohol use?
- What do you see in your future if you continue as you are?
- Another way to approach drinking is to look at how it has affected you in over your lifetime. Have you experienced long term negative effects from your drinking.

### **For scores below 8**

- From what you told me it looks like your drinking is under control.
- Are there any concerns or questions you have about drinking that you would like to discuss?

### **Elicit positive things about drinking alcohol**

- Tell me ways in which you think alcohol is beneficial, if any.
- If participant drinks
  - What do you like about alcohol?
  - What do you think you get out of drinking?
  - What do you think you would miss if alcohol was not available to you?

### **Transition statement**

- Now we are going to discuss drug use. Similar to alcohol use, drug use is something that has been shown to be related to risk taking for HIV/STI.
- Administer DAST (see below for the DAST).
- Any “yes” answers should be discussed. The DAST does NOT include alcohol. The DAST does include prescription medication used in a manner inconsistent with a doctor’s/health care provider’s direction. The DAST does include different classes of drugs. A partial list would include...cocaine, marijuana, heroin, MDMA (ecstasy), hydrocodone (found in cough suppressants, called vikes, Hydro, Norco), methamphetamine, inhalants (including nitrates [poppers], gases, aerosols, solvents), Oxycontin, LSD (acid), and steroids.

Information about alcohol and drug use should be weaved back into risks for HIV/STI.

### **Sexual risk reduction framework with alcohol and drug use components**

#### **Enhance participant’s sense of self-risk**

- Assess client’s sexual risk taking
- Listen for risk behavior
- Assess client’s level of concern for HIV/STI
- Listen for conflicts between beliefs and behaviors
  - Tell me about ways in which you may have protected yourself or taken risks for HIV in the past
  - How do you feel about any risks you might be taking?
  - How have drugs or alcohol had an effect on sexual risk taking?

### **Explore the specifics of the most recent risk incident.**

- Identify context that led to risky event
- Assess participants comfort level with risk
- Assess communication with partners about HIV
- Note sources of strength and resiliency
  - Let's talk about a recent incident where you think you might have taken risks.
  - What makes you think it was risky?
  - How do you feel about talking with your partners about risk?

### **Review previous risk-reduction strategies**

- Assess patterns of risk
- Identify obstacles
- Explore triggers
- Explore communication
  - When you think about the past what stands out to you regarding successes or challenges you have had in being able to protect yourself from HIV?
  - Tell me about how alcohol and drug use might affect your decision making?

### **Negotiate risk reduction**

- Identify a risk reduction plan
- Explore reasonable steps
- Assess motivation
  - What steps do you think you could take to protect yourself?
  - What or who could you connect with to find support?
  - How confident are you that you could engage in this plan?

### **Identify sources of support and provide referrals.**

- Assess participant's support system
- Address long standing concerns that contribute to risk
- Provide appropriate referrals

## **PROVIDE APPOINTMENT CARD AND REMINDER FOR FOLLOW UP**

### **Schedule participant for follow-up**

- Let's schedule a time that you would be available for your follow up appointment.
- Next time you come in it will only be a computer interview, no counseling session.

### **Identify ways to help the client remember follow up events.**

- What would help you remember this appointment? *[cell phone calendar, date book, card in wallet, card on refrigerator etc.]*

### **Thank the client for their participation**

- I hope that this time together has been helpful to you
- I want to thank you for your contribution to our project

**Box 4****The Alcohol Use Disorders Identification Test: Interview Version**

Read questions as written. Record answers carefully. Begin the AUDIT by saying "Now I am going to ask you some questions about your use of alcoholic beverages during this past year." Explain what is meant by "alcoholic beverages" by using local examples of beer, wine, vodka, etc. Code answers in terms of "standard drinks". Place the correct answer number in the box at the right.

|                                                                                                                                                                                                                                                                 |                                                                                                                                                                                                                                                           |
|-----------------------------------------------------------------------------------------------------------------------------------------------------------------------------------------------------------------------------------------------------------------|-----------------------------------------------------------------------------------------------------------------------------------------------------------------------------------------------------------------------------------------------------------|
| 1. How often do you have a drink containing alcohol?<br>(0) Never [Skip to Qs 9-10]<br>(1) Monthly or less<br>(2) 2 to 4 times a month<br>(3) 2 to 3 times a week<br>(4) 4 or more times a week <input type="text"/>                                            | 6. How often during the last year have you needed a first drink in the morning to get yourself going after a heavy drinking session?<br>(0) Never<br>(1) Less than monthly<br>(2) Monthly<br>(3) Weekly<br>(4) Daily or almost daily <input type="text"/> |
| 2. How many drinks containing alcohol do you have on a typical day when you are drinking?<br>(0) 1 or 2<br>(1) 3 or 4<br>(2) 5 or 6<br>(3) 7, 8, or 9<br>(4) 10 or more <input type="text"/>                                                                    | 7. How often during the last year have you had a feeling of guilt or remorse after drinking?<br>(0) Never<br>(1) Less than monthly<br>(2) Monthly<br>(3) Weekly<br>(4) Daily or almost daily <input type="text"/>                                         |
| 3. How often do you have six or more drinks on one occasion?<br>(0) Never<br>(1) Less than monthly<br>(2) Monthly<br>(3) Weekly<br>(4) Daily or almost daily<br><i>Skip to Questions 9 and 10 if Total Score for Questions 2 and 3 = 0</i> <input type="text"/> | 8. How often during the last year have you been unable to remember what happened the night before because you had been drinking?<br>(0) Never<br>(1) Less than monthly<br>(2) Monthly<br>(3) Weekly<br>(4) Daily or almost daily <input type="text"/>     |
| 4. How often during the last year have you found that you were not able to stop drinking once you had started?<br>(0) Never<br>(1) Less than monthly<br>(2) Monthly<br>(3) Weekly<br>(4) Daily or almost daily <input type="text"/>                             | 9. Have you or someone else been injured as a result of your drinking?<br>(0) No<br>(2) Yes, but not in the last year<br>(4) Yes, during the last year <input type="text"/>                                                                               |
| 5. How often during the last year have you failed to do what was normally expected from you because of drinking?<br>(0) Never<br>(1) Less than monthly<br>(2) Monthly<br>(3) Weekly<br>(4) Daily or almost daily <input type="text"/>                           | 10. Has a relative or friend or a doctor or another health worker been concerned about your drinking or suggested you cut down?<br>(0) No<br>(2) Yes, but not in the last year<br>(4) Yes, during the last year <input type="text"/>                      |
| Record total of specific items here <input type="text"/>                                                                                                                                                                                                        |                                                                                                                                                                                                                                                           |
| <i>If total is greater than recommended cut-off, consult User's Manual.</i>                                                                                                                                                                                     |                                                                                                                                                                                                                                                           |



1 Have you used drugs other than those required for medical reasons?  Yes  No

2 Do you abuse more than one drug at a time?  Yes  No

3 Are you unable to stop using drugs when you want to?  Yes  No

4 Have you ever had blackouts or flashbacks as a result of drug use?  Yes  No

5 Do you ever feel bad or guilty about your drug use?  Yes  No

6 Does your spouse (or parents) ever complain about your involvement with drugs?  Yes  No

7 Have you neglected your family because of your use of drugs?  Yes  No

8 Have you engaged in illegal activities in order to obtain drugs?  Yes  No

9 Have you ever experienced withdrawal symptoms (felt sick) when you stopped taking drugs?  Yes  No

10 Have you had medical problems as a result of your drug use (e.g., memory loss, hepatitis, convulsions, bleeding)?

1. What is your date of birth?
2. What gender were you assigned at birth?
3. What gender do you identify with?
4. Which best race/ethnicity describes you?
5. What is the highest grade or number of years of school that you completed?
6. Which ONE of the following is closest to your income?
7. Which of the following best describes your relationship status at this time?
8. How would you describe your sexual orientation?
9. Have you ever used PrEP? PrEP is taking anti-H I V medications to prevent H I V infection among H I V negative people?
10. Having the same H.I.V. status as my partner is one way to practice safer sex.
11. If my partner tells me that his H I V status is the same as mine, I am more likely to have unprotected sex with him.
12. If my partner tells me his H I V status is the same as mine we don't have to worry about using condoms.
13. If my partner tells me his H I V status is the same as mine then I worry less about H I V.
14. If my partner tells me his H I V status is negative, I believe him.
15. If I suggest using a condom my partner will suspect that I have been unsafe
16. I did not use a condom because my partner is the same H I V status as me so it doesn't matter.
17. I did not use a condom because He/I will withdraw before ejaculation and this will be safe.
18. He looks so healthy he can't possibly be H I V positive.
19. I did not use a condom because my partner can't be H I V positive if he is willing to have sex without a condom.
20. I did not use a condom because I'm sure he isn't H I V infected.
21. I did not use a condom because my regular partner only has unsafe sex with me so I'm safe.
22. I did not use a condom because I believe him when he says he is H I V negative.

23. I did not use a condom because I'm always the top/insertive partner therefore I'm safe
24. How risky is anal sex without a condom as the bottom (receptive) partner with a man you just met whose H I V status is unknown?
25. How risky is anal sex without a condom as the bottom (receptive) partner with a man you just met who tells you his H I V status is negative?
26. How risky is anal sex without a condom as the bottom (receptive) partner with a man you just met who tells you his H I V status is negative and that he just recently tested negative?
27. How risky for H I V infection is being the bottom or receptive partner during unprotected anal sex?
28. How risky for H I V infection is being the top or insertive partner during unprotected anal sex?
29. I am certain that I can tell a new sex partner my H I V status
30. I am certain that I can ask a new sex partner his H I V status.
31. I am certain that I can have a discussion about H I V status before having sex with a new partner.
32. How much have you drank alcohol in the past 3 months?
33. How much have you used pot (420, marijuana, weed) in the past 3 months?
34. How much have you smoked crack in the past 3 months?
35. How much have you used cocaine in the past 3 months?
36. How much have you used poppers (nitrite inhalants) in the past 3 months?
36. How much have you used Methamphetamine/Crystal Meth/Meth/Tina in the past 3 months?
37. How much have you used Viagra/Cialis or another drug like it without a prescription in the past 3 months?
38. How much have you used any injected drug (shot up) in the past 3 months?
39. How much have you used any other drug without a prescription in the past 3 months?
40. In the past week, I was bothered by things that usually don't bother me
41. In the past week, I had trouble keeping my mind on what I was doing.
42. In the past week, I felt depressed.
43. In the past week, I felt that everything I did was an effort.

44. In the past week, I felt hopeful about the future.
45. In the past week, I felt fearful.
46. In the past week, my sleep was restless.
47. In the past week, I was happy.
48. In the past week, I felt lonely.
49. In the past week, I could not "get going."
50. In the past three months have you been diagnosed or treated for Chlamydia?
51. In the past three months have you been diagnosed or treated for gonorrhea?
52. In the past three months have you been diagnosed or treated for syphilis?
53. In the past three months have you had a recurrent episode or been newly diagnosed with herpes?
54. In the past three months have you had a recurrent episode or been newly diagnosed with genital warts?
55. In the past three months have you experienced burning when urinating or noticed discharge from your penis?
56. In the past three months have you experienced sores on your penis?
57. In the past three months have you experienced sores in or around your rectum?
58. In the past 3 months, how many men have you had sex with?
59. Of the [Response to PREVIOUS] men that you have had sex with in the past 3 months, how many were H.I.V. positive?
60. Of the [Response to PREVIOUS] men that you had sex with in the past 3 months how many were H.I.V. negative?
61. Of the [Response to PREVIOUS] men that you had sex with in the past 3 months how many did you not know their H.I.V. status when you had sex with them?
62. Of the [Response to PREVIOUS] men you had sex with in the past 3 months, how many of these men did you have anal sex with?
63. Of the [Response to PREVIOUS] men that you have had anal sex with in the past 3 months, how many were H.I.V. positive?

64. How many times in the past 3 months did you have anal sex with these [Response to PREVIOUS] H.I.V. positive men where you were bottom and your partner did not use a condom? That is your partner inserted his penis into your anus without a condom.

65. How many times in the past 3 months did you have anal sex with these [Response to PREVIOUS] H.I.V. positive men where you were bottom and your partner did use a condom? That is your partner inserted his penis into your anus with a condom.

66. How many times in the past 3 months did you have anal sex with these [Response to PREVIOUS] H.I.V. positive men where you were top and you did not use a condom? That is you inserted your penis into your partner's anus without a condom.

67. How many times in the past 3 months did you have anal sex with these [Response to PREVIOUS] H.I.V. positive men where you were top and you did use a condom? That is you inserted your penis into your partner's anus with a condom.

68. Of the [Response to PREVIOUS] men that you have had anal sex with in the past 3 months, how many were H.I.V. negative?

69. How many times in the past 3 months did you have anal sex with these [Response to PREVIOUS] H.I.V. negative men where you were bottom and your partner did not use a condom? That is your partner inserted his penis into your anus without a condom.

70. How many times in the past 3 months did you have anal sex with these [Response to PREVIOUS] H.I.V. negative men where you were bottom and your partner did use a condom? That is your partner inserted his penis into your anus with a condom.

71. How many times in the past 3 months did you have anal sex with these [Response to PREVIOUS] H.I.V. negative men where you were top and you did not use a condom? That is you inserted your penis into your partner's anus without a condom.

72. How many times in the past 3 months did you have anal sex with these [Response to PREVIOUS] H.I.V. negative men where you were top and you did use a condom? That is you inserted your penis into your partner's anus with a condom.

73. Of the [Response to PREVIOUS] men that you have had anal sex with in the past 3 months, how many did you not know their H.I.V. status?

74. How many times in the past 3 months did you have anal sex with these [Response to PREVIOUS] men whose H.I.V. status you did not know where you were bottom and your partner did not use a condom? That is your partner inserted his penis into your anus without a condom.

75. How many times in the past 3 months did you have anal sex with these [Response to PREVIOUS] men whose H I V status you did not know where you were bottom and your partner did use a condom? That is your partner inserted his penis into your anus with a condom.

76. How many times in the past 3 months did you have anal sex with these [Response to PREVIOUS] men whose H.I.V. status you did not know where you were top and you did not use a condom? That is you inserted your penis into your partner's anus without a condom.

77. How many times in the past 3 months did you have anal sex with these [Response to PREVIOUS] men whose H.I.V. status you did not know where you were top and you did use a condom? That is you inserted your penis into your partner's anus with a condom.

KZ-ET

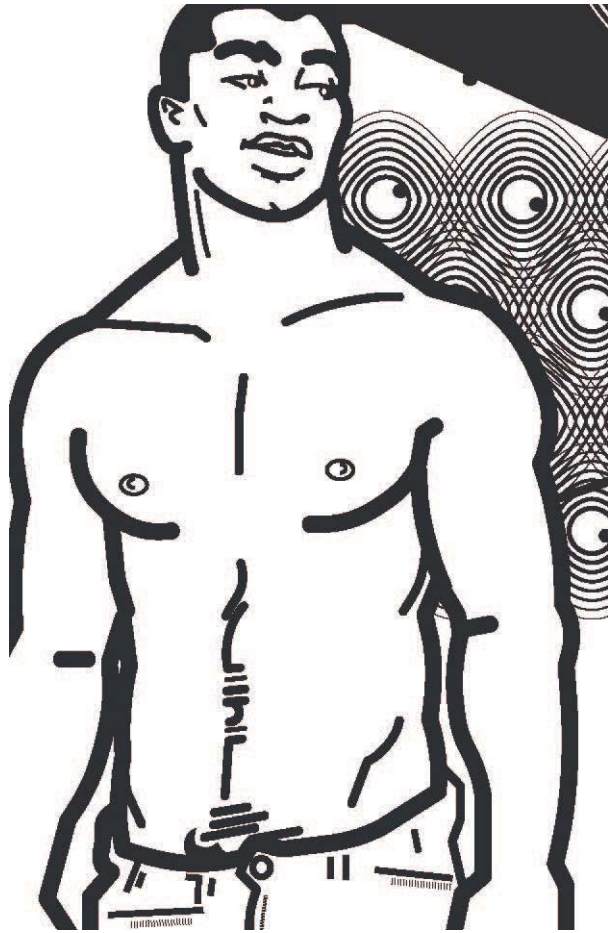

TW-CB

Thinking about your sexual activities, how much risk do you think you are currently taking for HIV?

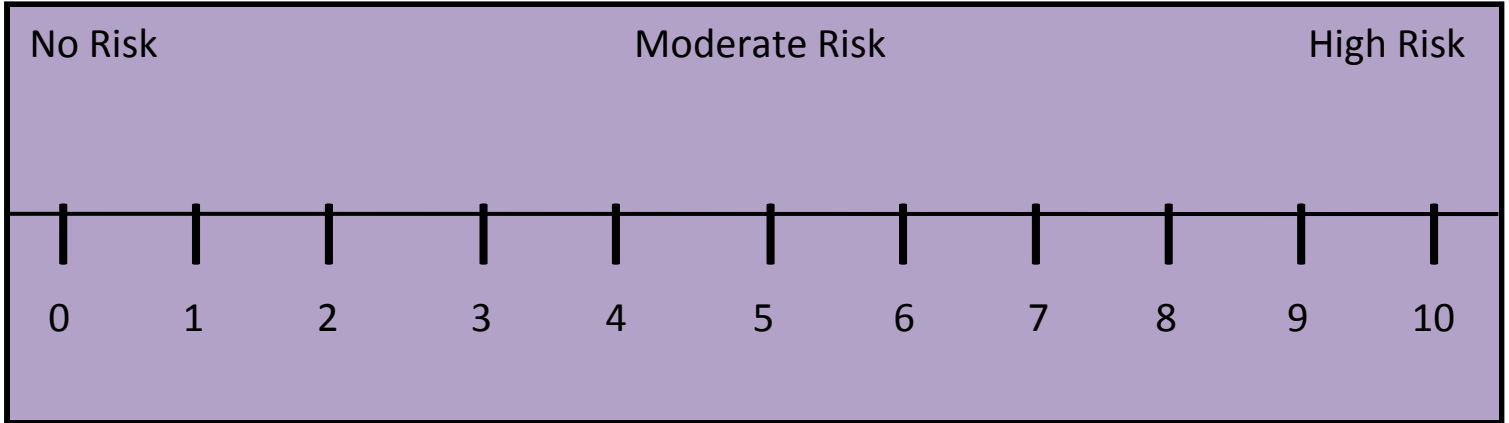

How did Mike put himself at risk for HIV and what could he have done differently?

Risky Behaviors

---

---

---

Safer Alternatives

---

---

---



*Your Story*

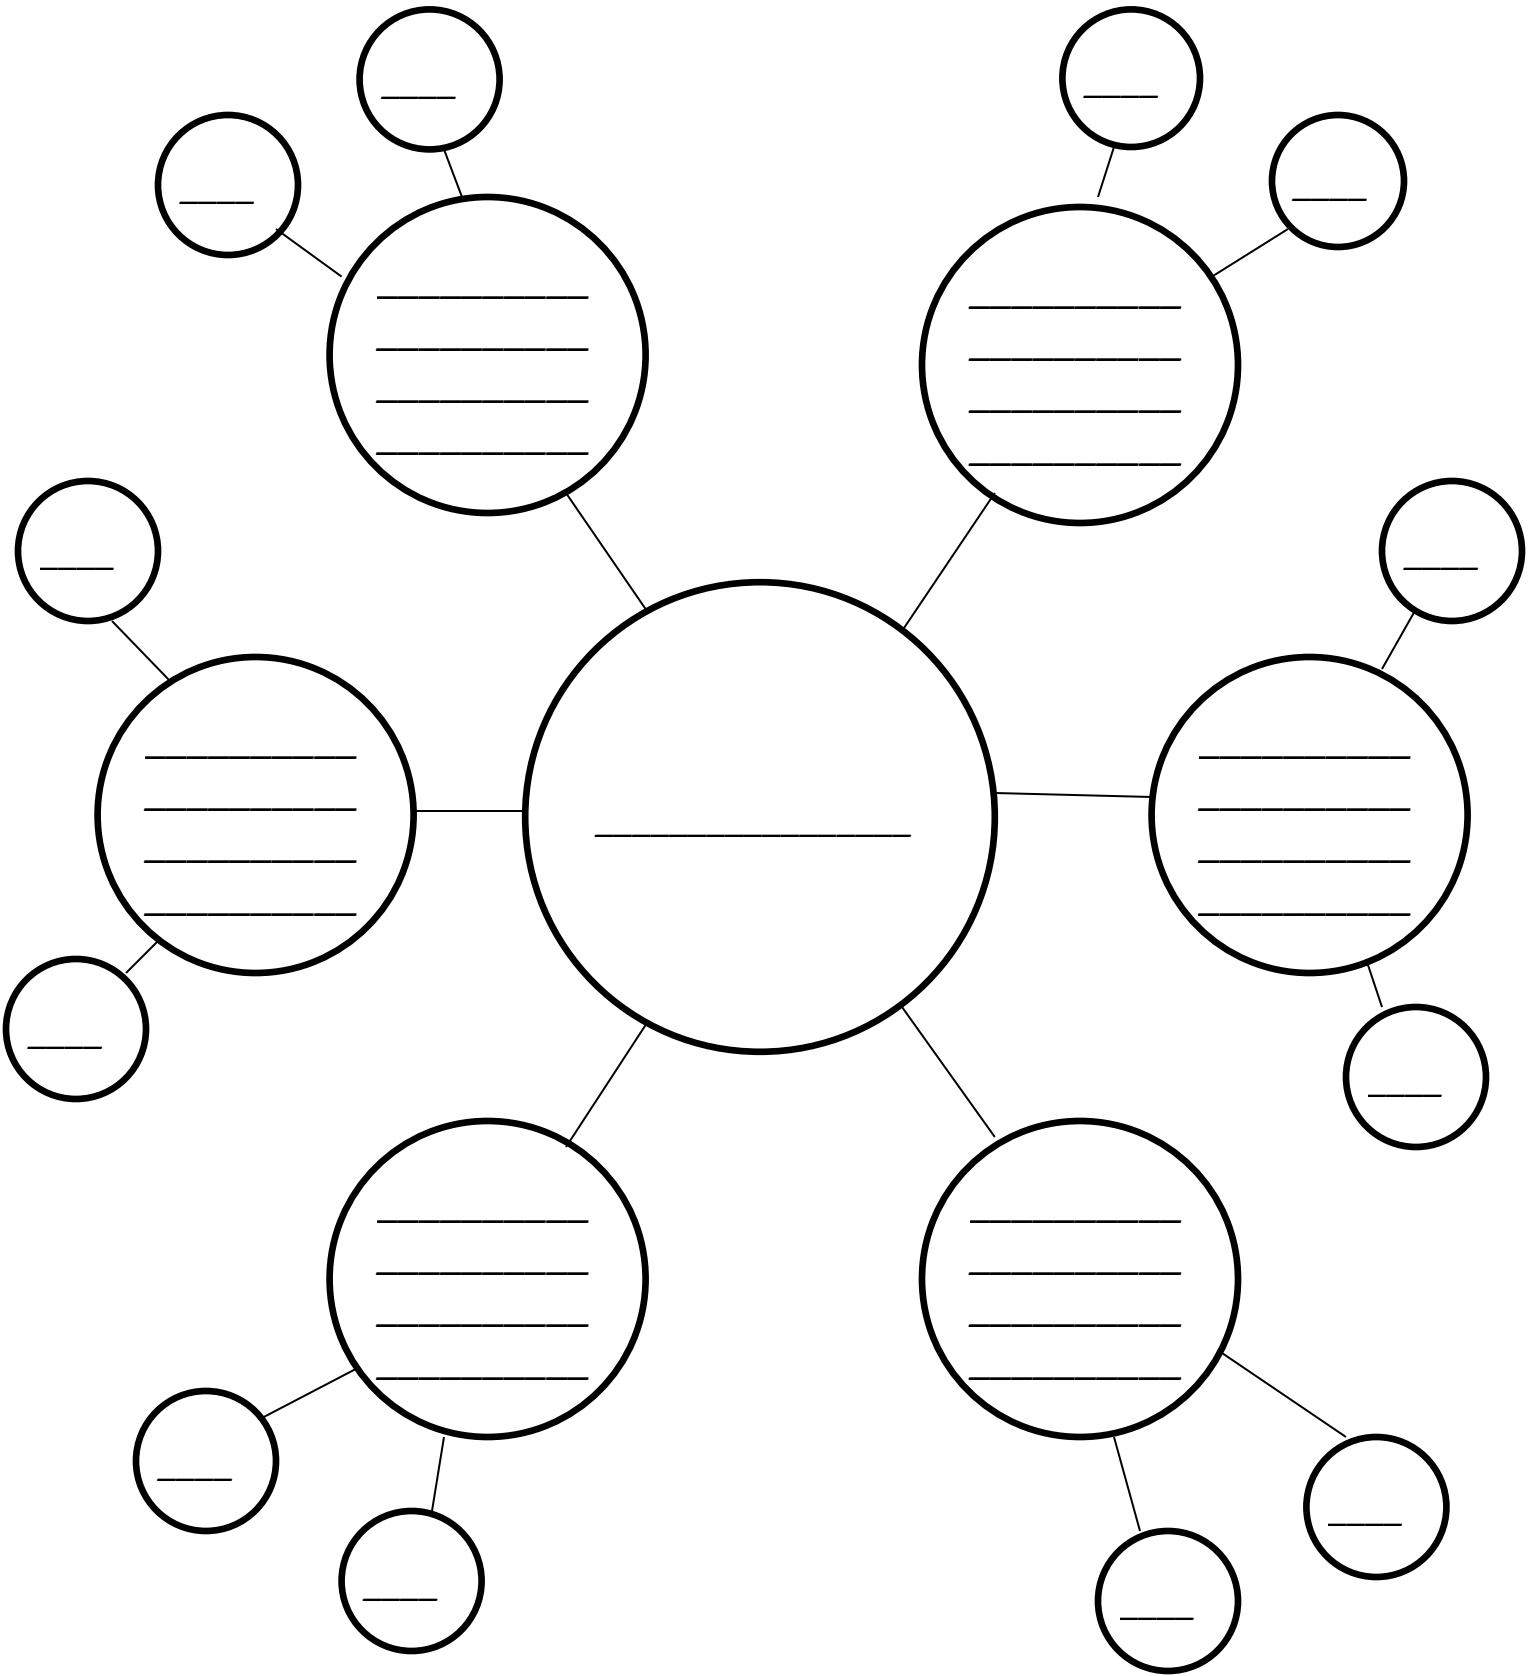

Thinking about your sexual activities and our discussions, how much risk for HIV have you been taking?

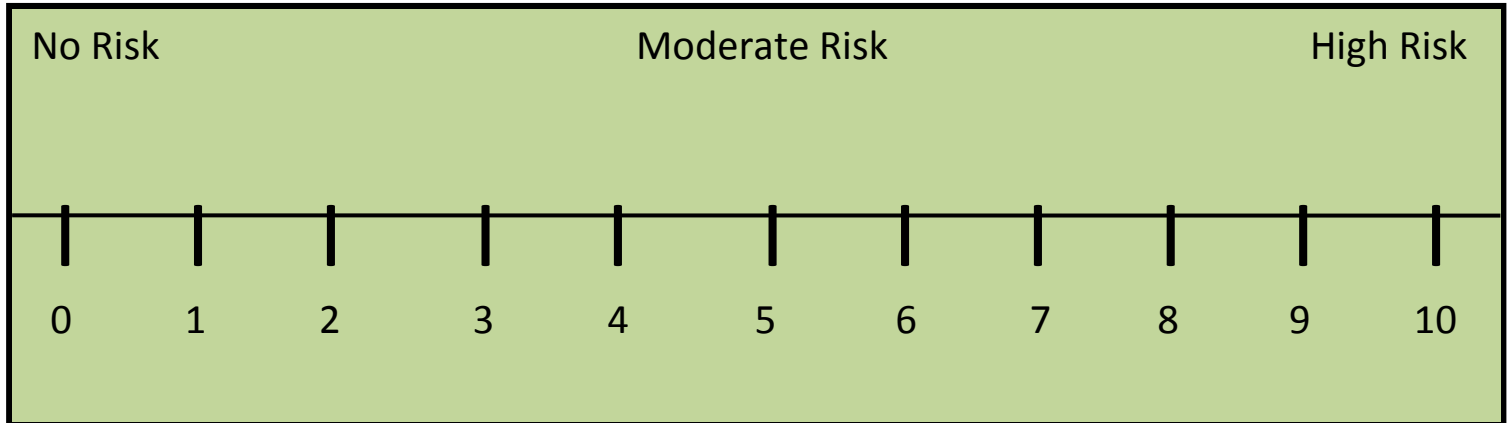

Thinking about the future and our discussions today, how much risk for HIV are you willing to take?

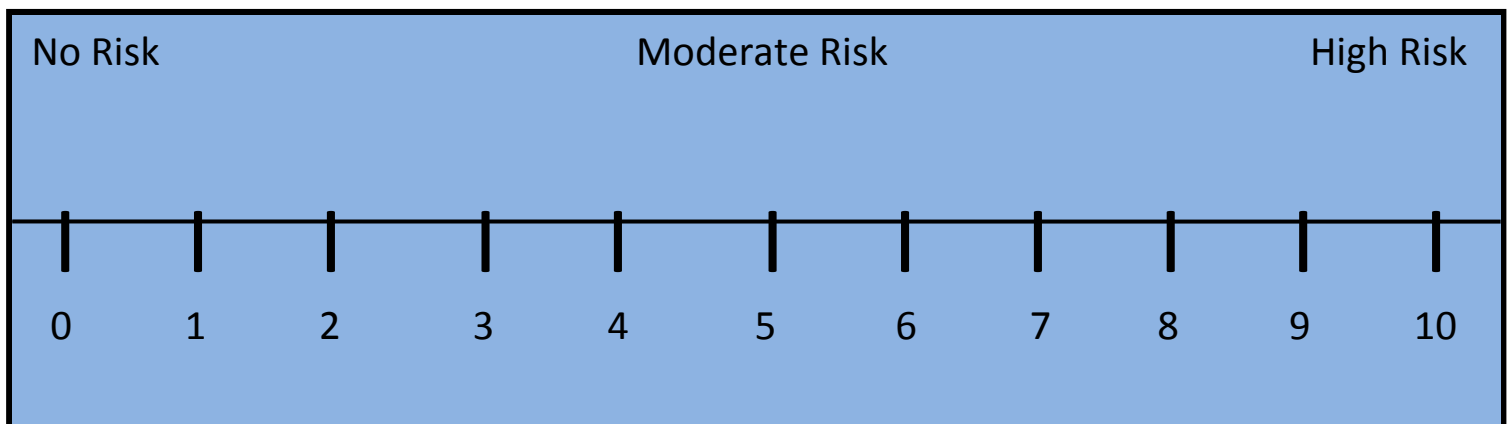

# How can you stay safe?

Goals

Obstacles

Action Steps

---

---

---

---

---

---

---

---

---

How sure are you that you can reach your goals?

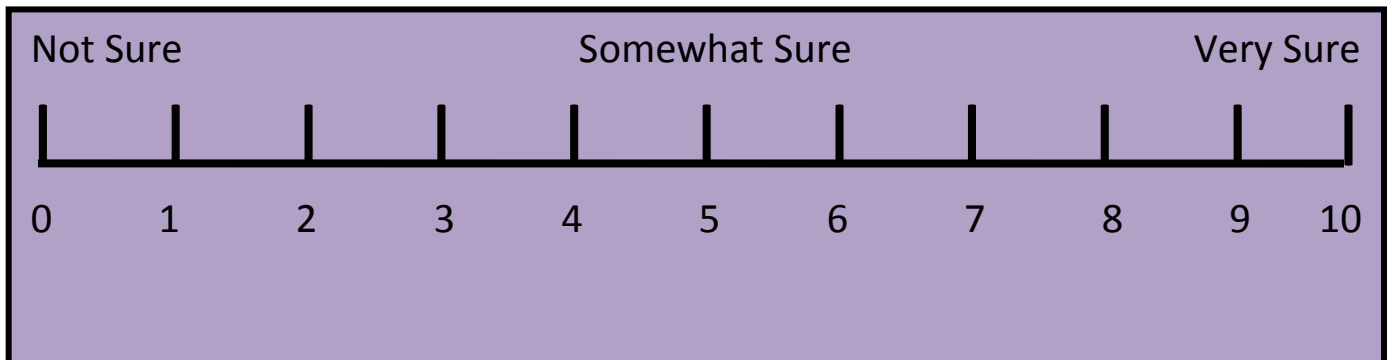

## A Closer Look at the Window Period

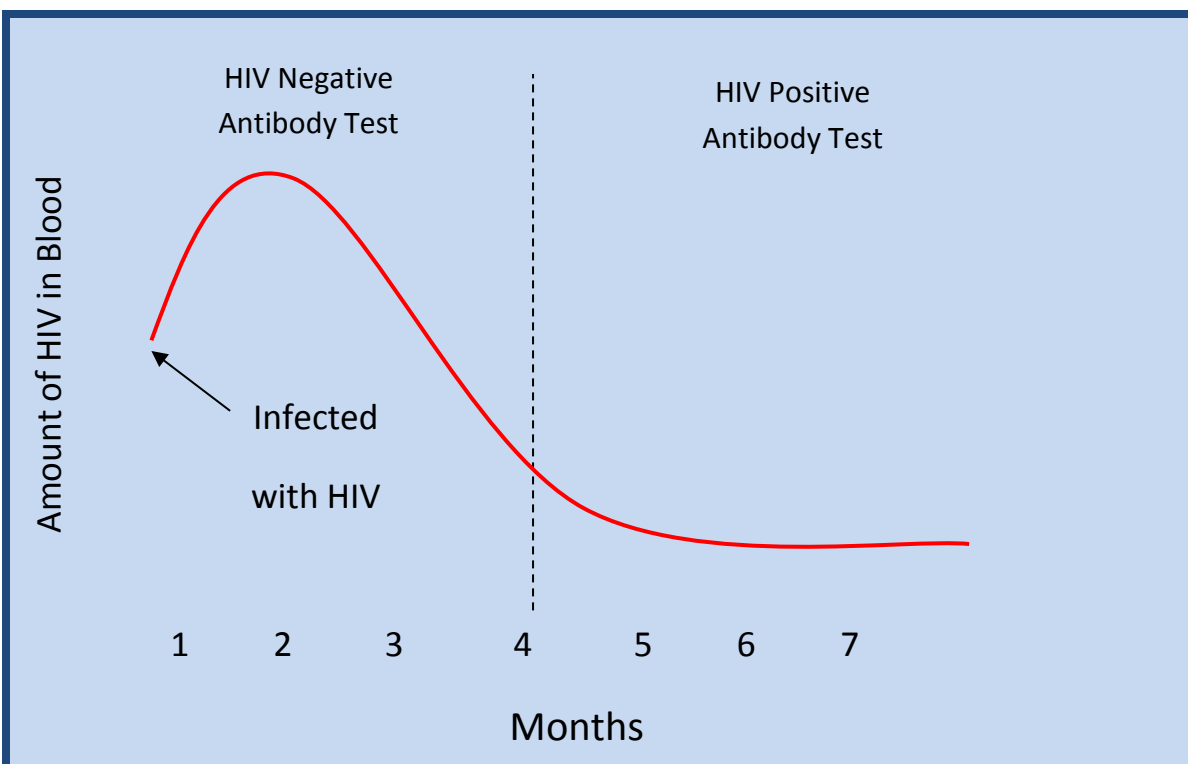

Supplement: inline-supplementary-material-1 [file inline-supplementary-material-1.pdf]
